# Supplementary material
Source: PubMed Central journal article supplement (PMC6571061)
Supplement: NIHMS1523810-supplement-9.pdf [file NIHMS1523810-supplement-9.pdf]

| <b>Supplementary Table S1</b>                                                                                                                   |                 |
|-------------------------------------------------------------------------------------------------------------------------------------------------|-----------------|
| N-acetyl Aspartic acid-d3                                                                                                                       | Metabolite ISTD |
| Tryptophan-15N2                                                                                                                                 | Metabolite ISTD |
| Sarcosine-d3                                                                                                                                    | Metabolite ISTD |
| Glutamic acid-d5                                                                                                                                | Metabolite ISTD |
| Thymine-d4                                                                                                                                      | Metabolite ISTD |
| Gibberellic acid                                                                                                                                | Metabolite ISTD |
| Trans-Zeatin                                                                                                                                    | Metabolite ISTD |
| Jasmonic acid                                                                                                                                   | Metabolite ISTD |
| 15N Anthranilic acid                                                                                                                            | Metabolite ISTD |
| Testosterone-d3                                                                                                                                 | Metabolite ISTD |
| 1-heptadecanoyl-2-hydroxy- <i>sn</i> -glycero-3-phosphocholine (LPC) (17:0/0:0)                                                                 | Lipid ISTD      |
| 1,2-diheptadecanoyl- <i>sn</i> -glycero-3- Phosphatidylcholine (PC) (17:0/17:0)                                                                 | Lipid ISTD      |
| 1,2-diheptadecanoyl- <i>sn</i> -glycero-3- Phosphatidylethanolamine (PE) (17:0/17:0),                                                           | Lipid ISTD      |
| 1,2-diheptadecanoyl- <i>sn</i> -glycero-3- Phosphatidylserine (PS) (17:0/17:0)                                                                  | Lipid ISTD      |
| N-heptadecanoyl-D- <i>erythro</i> - sphingosylphosphorylcholine 17:0 (SM) (d18:1/17:0)                                                          | Lipid ISTD      |
| cholest-5-en-3 $\beta$ -yl heptadecanoate 17:0 cholesteryl ester (CE)                                                                           | Lipid ISTD      |
| 1-palmitoyl-2-oleoyl- <i>sn</i> -glycerol 16:0-18:1 (DAG)                                                                                       | Lipid ISTD      |
| 1-heptadecanoyl- <i>rac</i> -glycerol 17:0 (MAG)                                                                                                | Lipid ISTD      |
| 1,2,3-triheptadecanoyl-glycerol Tri-heptadecanoate 17:0 (TAG)                                                                                   | Lipid ISTD      |
| N-heptadecanoyl-D- <i>erythro</i> -sphingosine C17 Ceramide (d18:1/17:0) (Cer-P)                                                                | Lipid ISTD      |
| 1,2-diheptadecanoyl- <i>sn</i> -glycero-3-phosphate 17:0 (PA)                                                                                   | Lipid ISTD      |
| 1,2-diheptadecanoyl- <i>sn</i> -glycero-3-phospho-(1'- <i>rac</i> -glycerol) 17:0 Phosphoglycerol (PG)                                          | Lipid ISTD      |
| 1-heptadecanoyl-2-(5Z,8Z,11Z,14Z-eicosatetraenoyl)- <i>sn</i> -glycero-3-phospho-(1'- <i>myo</i> -inositol) 17:0-20:4 Phosphatidylinositol (PI) | Lipid ISTD      |
