# Supplementary material
Source: PubMed Central journal article supplement (PMC6571061)
Supplement: NIHMS1523810-supplement-10.pdf [file NIHMS1523810-supplement-10.pdf]

**Supplementary Table S2**

| Name       | Sequence                      |
|------------|-------------------------------|
| CPT1B FP   | TGT ATC GCC GTA AAC TGG ACC G |
| CPT1B RP   | TGT CTG AGA GGT GCT GTA GCA C |
| ATP8B2 FP  | CGG CTA TTC CTG CAA GAT GCT G |
| ATP8B2 RP  | GTC CTG ATA GGT GAA GCC GTT G |
| PLA2G4C FP | GGA AGA CTG GTC AGA ACT CAC C |
| PLA2G4C RP | GCA TTA GCA ACA GCC CTT CTC C |
| GAPDH FP   | GAGTCAACGGATTTGGTCGT          |
| GAPDH RP   | TTGATTTTGGAGGGATCTCG          |
| Vim FP     | AGCTAACCAACGACAAGCC           |
| Vim RP     | TCCACTTTGCGTTCAAGGTC          |
| SNAIL FP   | AAGATGCACATCCGAAGCCA          |
| SNAIL RP   | CTCTTGGTGCTTGTGGAGCA          |
| Alu FP     | GTCAGGAGA-TCGAGACCATCCT       |
| Alu RP     | AGTGGCGCAATCTCGGC             |
