# Supplementary material
Source: PubMed Central journal article supplement (PMC6571061)
Supplement: NIHMS1523810-supplement-11.pdf [file NIHMS1523810-supplement-11.pdf]

**Supplementary Table S3**

**BLCA Tissue samples**

| <b>BLCA Patients Characteristics</b> |                          |
|--------------------------------------|--------------------------|
| <b>Grade</b>                         | Low Grade (n=5;20%)      |
|                                      | High Grade (n=20;80%)    |
| <b>Stage</b>                         | Ta (n= 5; 20%)           |
|                                      | T1 (n=5; 20%)            |
|                                      | T2 (n=5; 20 %)           |
|                                      | T3 (n=5; 20 %)           |
|                                      | T4 (n=5; 20 %)           |
| <b>Gender</b>                        | n= 23(92%; Male)         |
|                                      | n=02(8%; Female)         |
| <b>Vital status</b>                  | n=18 (72%; Live)         |
|                                      | n=06(24%; Dead)          |
|                                      | n=01 (4%; Missing)       |
| <b>Lymph node metastasis</b>         | N0 (n=19; 76%)           |
|                                      | N1 (n=3; 12%)            |
|                                      | NX (n=1; 4%)             |
|                                      | N3 (n=1; 4%)             |
|                                      | Missing (n=1; 4%)        |
| <b>Smoking status</b>                | n=5 (20%; Never smoker)  |
|                                      | n=17 (68%; Ex-smoker)    |
|                                      | n=2 (8%; Current smoker) |
|                                      | n=1 (4%; Missing)        |
| <b>Cohorts</b>                       | UTSW (n= 25; 100%)       |
