# Supplementary material
Source: PubMed Central journal article supplement (PMC6571061)
Supplement: NIHMS1523810-supplement-12.pdf [file NIHMS1523810-supplement-12.pdf]

**Supplementary Table S4**

| Metabolites                                                  | Mass (m/z) | LogFoldChange | LinearFoldChange |
|--------------------------------------------------------------|------------|---------------|------------------|
| (-)-Epinephrine                                              | 166.0853   | -0.69593      | 0.617312574      |
| (-)-N-Acetylneuraminic acid                                  | 310.1119   | 0.504788      | 1.41891531       |
| (-)-Verbenone                                                | 151.0482   | -0.28233      | 0.822260654      |
| (.+/-)-17-Hydroxy-4Z,7Z,10Z,13Z,15E,19Z-docosahexaenoic acid | 327.2164   | -0.23159      | 0.851696137      |
| (.+/-)-4-Hydroxy-5E,7Z,10Z,13Z,16Z,19Z-docosahexaenoic acid  | 327.2184   | -0.20485      | 0.867627713      |
| (.+/-)-7-Hydroxy-4Z,8E,10Z,13Z,16Z,19Z-docosahexaenoic acid  | 326.2122   | 0.118286      | 1.085444587      |
| (.+/-)-8-Hydroxy-4Z,6E,10Z,13Z,16Z,19Z-docosahexaenoic acid  | 326.232    | -0.23782      | 0.848023305      |
| (.+/-)-9-Hydroxy-5Z,7E,11Z,14Z,17Z-eicosapentaenoic acid     | 301.1426   | -0.67049      | 0.628293616      |
| (+)-2,5-epi-Gonithalesdiol                                   | 249.1442   | 0.259613      | 1.197157154      |
| (+/-)-2-cis-4-trans-Abcisic acid                             | 247.0775   | -0.47302      | 0.720454715      |
| (+/-)-11-Hydroxy-5Z,8Z,12E,14Z,17Z-eicosapentaenoic acid     | 301.2161   | -0.26933      | 0.829703641      |
| (+/-)-16(17)-Epoxy-4Z,7Z,10Z,13Z,19Z-docosapentaenoic acid   | 327.2164   | 0.105306      | 1.075722283      |
| (3-Carboxypropyl)trimethylammonium cation                    | 146.1176   | 0.516383      | 1.430365115      |
| (7,7-Dimethyl-2-oxonorbornan-1-yl)methanesulfonic acid       | 231.0279   | 0.393862      | 1.313905839      |
| (R)-(+)-Citronellic acid                                     | 171.063    | -0.36092      | 0.778667754      |
| (R)-Butaprost                                                | 358.2954   | 0.3476        | 1.272442412      |
| (Z,E)-Tetradeca-9,12-dienol                                  | 210.0884   | -0.24627      | 0.843075586      |
| Bisabolol                                                    | 223.0273   | -0.29711      | 0.813881082      |
| CMBHC                                                        | 136.0622   | 0.391139      | 1.311428184      |
| Guanidinoglutamic acid                                       | 189.1354   | -0.52365      | 0.695609695      |
| Hydroxyisocaproic acid                                       | 155.0417   | 0.444073      | 1.360439559      |
| Estradiol                                                    | 289.1439   | -0.1741       | 0.88632189       |
| Estradiol 17-propionate                                      | 347.1273   | -0.48352      | 0.715228345      |
| Estradiol 3-benzoate                                         | 253.1431   | -0.29305      | 0.816174161      |
| Nicotinamide adenine dinucleotide                            | 664.1174   | -0.62518      | 0.648339755      |
| 17-6-Ketoprostaglandin F1.alpha.                             | 367.0421   | -0.33153      | 0.794695716      |
| 6 Testosterone enanthate                                     | 269.1355   | -0.21134      | 0.863734513      |
| 3 Arachidonic acid                                           | 305.1966   | 0.272443      | 1.207851433      |
| 3 Arachidonic acid ethyl ester                               | 333.2884   | 0.463242      | 1.378636827      |
| 1-(2-Hydroxyethyl)-2-hydroxymethyl-5-nitroimidazole          | 188.0664   | 0.255187      | 1.193490377      |
| 1-(4-Methoxyphenyl)piperazine                                | 191.9827   | -0.7364       | 0.600233289      |
| 1,11-Undecanedicarboxylic acid                               | 226.1784   | -0.29387      | 0.815710978      |
| 1,2-Benzenedicarboxylic acid                                 | 149.0233   | -0.34485      | 0.787391961      |
| 1,2-Diamino-2-methylpropane                                  | 72.0835    | 0.249036      | 1.188413143      |
| 1,2-Dilinoleoyl-sn-glycero-3-phospho-(1'-rac-glycerol)       | 507.2734   | 0.179674      | 1.132628182      |
| 1,2-Dipalmitoleoyl-sn-glycero-3-phosphoethanolamine          | 686.0449   | -0.23436      | 0.850064308      |
| 1,3-Dicyclohexylurea                                         | 225.1939   | -0.08764      | 0.941063452      |
| 1,5-Diaminonaphthalene                                       | 158.0412   | 0.489038      | 1.403508337      |
| 1,6-Anhydro-2,3-O-isopropylidene-.beta.-D-mannopyranose      | 203.0878   | 0.09438       | 1.067606135      |
| 10(S),17(S)-DiHDoHE                                          | 343.2082   | -0.35898      | 0.779716145      |
| 11,15-Dioxo-9S-hydroxy-5Z-prostenoic acid                    | 352.3053   | -0.31746      | 0.802479289      |
| 11.alpha.-Hydroxyprogesterone                                | 331.2646   | -0.14071      | 0.907069939      |
| 11.beta.,17.alpha.,20.beta.,21-Tetrahydroypregn-4-en-3-one   | 365.2785   | 0.38489       | 1.305760421      |

|                                                                         |          |          |             |
|-------------------------------------------------------------------------|----------|----------|-------------|
| 11-.beta.-Hydroxyandrosterone                                           | 288.2903 | 0.146188 | 1.106641852 |
| 11.beta.-Prostaglandin E2                                               | 335.2222 | -0.30685 | 0.808405632 |
| 11-Dehydrothromboxane B2                                                | 367.2681 | -0.19453 | 0.873854665 |
| 11-Deoxyprostaglandin E1                                                | 303.1997 | 0.220565 | 1.165189823 |
| 11-Deoxyprostaglandin F1.alpha.                                         | 339.2528 | 0.281069 | 1.215094943 |
| 11-Nor-.DELTA.9-tetrahydrocannabinol-9-carboxylic acid-d3               | 329.1606 | 0.232764 | 1.17508406  |
| 11-Oxo-15S-hydroxy-5Z,9,13E-prostatrienoic acid                         | 317.2682 | -0.21675 | 0.860499251 |
| 11S-Hydroxy-5Z,8Z,12E,14Z-eicosatetraenoic acid                         | 304.1857 | 0.649628 | 1.568764096 |
| 12(13)-Epoxy-9Z-octadecenoic acid                                       | 278.2474 | -0.20832 | 0.865543587 |
| 12(S)-HpEPE                                                             | 317.2667 | -0.23745 | 0.848240383 |
| 12-Ketodeoxycholic acid                                                 | 373.2574 | -0.30313 | 0.810491839 |
| 13(S)-HODE methyl ester                                                 | 261.1109 | -0.3355  | 0.792508971 |
| 13(S)-HODE-biotin                                                       | 259.1429 | -0.62132 | 0.650074098 |
| 13,14-Dehydro-15-cyclohexyl Carbaprostacyclin                           | 328.1847 | -0.48043 | 0.716765954 |
| 13,14-Dihydro-15-ketoprostaglandin F2.alpha. isopropyl ester            | 202.1076 | -0.54706 | 0.684411727 |
| 13,14-Dihydro-15-keto-tetranor prostaglandin F1.beta.                   | 283.1813 | -0.29915 | 0.81273387  |
| 13,14-Dihydro-16,16-difluoroprostaglandin J2                            | 355.2437 | 0.206942 | 1.154239236 |
| 14(15)-EET ethanolamide                                                 | 345.1051 | 1.247207 | 2.373814099 |
| 14,15-EE-(5Z)-E                                                         | 325.2375 | -0.15694 | 0.896928227 |
| 14,15-EE-(8Z)-E                                                         | 307.2269 | 0.166886 | 1.122632787 |
| 15(R),19(R)-Hydroxyprostaglandin F1.alpha.                              | 353.2298 | -0.28065 | 0.823218504 |
| 15(R)-15-Methylprostaglandin D2                                         | 348.2107 | -0.19848 | 0.871465401 |
| 15(R)-15-Methylprostaglandin F2.alpha. methyl ester                     | 365.2325 | -0.28121 | 0.822900516 |
| 15(R)-Methylprostaglandin A2                                            | 331.2488 | -0.18094 | 0.882129578 |
| 15(S)-15-Methylprostaglandin E2                                         | 348.2734 | 0.200422 | 1.149034019 |
| 15(S)-HpEDE                                                             | 322.2745 | 0.276466 | 1.211223849 |
| 15(S)-HpEPE                                                             | 317.2697 | -0.19356 | 0.874444882 |
| 15-HEDE                                                                 | 237.1499 | -0.23366 | 0.850474031 |
| 15-Ketofluprostenol                                                     | 421.229  | -0.26788 | 0.830541854 |
| 15-Ketoilprost                                                          | 341.2342 | 0.199355 | 1.148184756 |
| 15-Ketoprostaglandin E1                                                 | 353.2323 | -0.29006 | 0.817866143 |
| 15-Ketoprostaglandin E2                                                 | 332.2164 | 0.167566 | 1.123161918 |
| 15S-Hydroxy-8Z,11Z,13E-eicosatrienoic acid                              | 287.2373 | 0.35293  | 1.277151872 |
| 16,16-Dimethylprostaglandin D2                                          | 362.2366 | 0.747176 | 1.678504002 |
| 16,16-Dimethylprostaglandin F2.alpha.                                   | 365.2324 | -0.30427 | 0.809850664 |
| 16-Phenoxy tetranor prostaglandin F2.alpha. methyl amide                | 337.1066 | -0.3806  | 0.768119126 |
| 16-Phenyl tetranor prostaglandin F2.alpha.                              | 355.2488 | 0.219134 | 1.164034496 |
| 17.alpha.-Hydroxypregnenolone                                           | 315.1826 | -0.2273  | 0.854232654 |
| 17.alpha.-Methyltestosterone                                            | 285.2066 | -0.43409 | 0.740159136 |
| 17-Keto-(7Z,10Z,13Z,15E,19Z)-docosapentaenoic acid                      | 327.2626 | 0.108354 | 1.077997475 |
| 17-Octadecynoic acid                                                    | 299.2594 | -0.24962 | 0.841117061 |
| 17-Phenoxy trinor prostaglandin F2.alpha. ethyl amide                   | 351.1772 | -0.27063 | 0.828956328 |
| 17-Phenyl trinor prostaglandin E2                                       | 367.2712 | -0.16136 | 0.894179203 |
| 17-trans-Prostaglandin E3                                               | 333.2066 | 0.140089 | 1.101973452 |
| 17-Trifluoromethylphenyl trinor prostaglandin F2.alpha.                 | 361.1462 | -0.26304 | 0.833331086 |
| 17-Trifluoromethylphenyl trinor prostaglandin F2.alpha. isopropyl ester | 481.2811 | -0.30422 | 0.809881045 |
| 19(20)-EpDPE                                                            | 327.2192 | -0.25012 | 0.840828994 |

|                                                                       |          |          |             |
|-----------------------------------------------------------------------|----------|----------|-------------|
| 19(R)-Hydroxyprostaglandin B2                                         | 333.2077 | -0.37607 | 0.770531827 |
| 1H-1,2,4-Triazol-3-amine                                              | 86.0986  | 0.391874 | 1.312096755 |
| 1-Hexadecanoyl-2-sn-glycero-3-phosphate                               | 393.241  | -0.32209 | 0.799907728 |
| 1-Hexadecanoyl-sn-glycerol                                            | 331.0795 | 0.247965 | 1.187531166 |
| 1'-Hydroxymidazolam .beta.-D-glucuronide                              | 518.1122 | -0.76818 | 0.587157263 |
| 1-Methylnicotinamide cation                                           | 137.0721 | -1.20277 | 0.434439805 |
| 1-Octadecanoyl-2-(5Z,8Z,11Z,14Z-eicosatetraenoyl)-sn-glycero-3-phosph | 341.1984 | -0.29493 | 0.81511247  |
| 1-Octadecanoyl-sn-glycero-3-phospho-(1'-myo-inositol)                 | 599.3201 | 0.653142 | 1.572589388 |
| 1-Palmitoyl-2-docosahexaenoyl-sn-glycero-3-phospho-(1'-rac-glycerol)  | 367.2105 | -0.37558 | 0.770795874 |
| 1-Pentadecanoyl-sn-glycero-3-phosphocholine                           | 269.2097 | 0.115891 | 1.083644418 |
| 2-(4-Ethoxyphenyl)-4-oxo-4H-chromen-3-yl 4-bromobenzenesulfonate      | 280.9072 | -0.16825 | 0.889923483 |
| 2,3-Dihydroxynaphthalene                                              | 161.0309 | 0.206122 | 1.153583177 |
| 2,4,7,9-Tetramethyl-5-decyne-4,7-diol                                 | 243.1946 | 0.195366 | 1.14501478  |
| 2,5-Dimethoxycinnamic acid                                            | 191.9819 | 0.110146 | 1.079337649 |
| 2,6-Di-tert-butyl-4-hydroxymethylphenol                               | 219.1008 | -0.36399 | 0.777010545 |
| 2,6-Xylidine                                                          | 122.0978 | 0.331383 | 1.258218676 |
| 20a,20b-Dihomo-9-oxo-11R,15S-dihydroxy-5Z,13E-prostadienoic acid      | 327.2329 | 0.278292 | 1.212758571 |
| 20-HETE ethanolamide                                                  | 345.1031 | 1.19521  | 2.289782046 |
| 20-Hydroxycholesterol                                                 | 384.2911 | -0.28938 | 0.818254    |
| 24S-Hydroxycholesterol                                                | 384.2989 | -0.1954  | 0.873332486 |
| 26-Hydroxycholesterol-(25R)                                           | 302.1383 | -0.40265 | 0.756466517 |
| 2-Amino-1-phenylethanol                                               | 120.0807 | 0.279527 | 1.213797004 |
| 2-Butanone, 4-(2,6,6-trimethyl-2-cyclohexen-1-yl)-                    | 195.1378 | 0.137103 | 1.099695015 |
| 2-Butenoic acid, 3-methyl-                                            | 100.112  | -0.36623 | 0.775808052 |
| 2'-Deoxyadenosine 5'-monophosphate                                    | 332.0747 | 0.448528 | 1.364647508 |
| 2'-Deoxyuridine 5'-monophosphate                                      | 352.0588 | 0.615633 | 1.532229846 |
| 2-Ethylhexanal                                                        | 129.0399 | 2.008423 | 4.023421427 |
| 2-Fluoropalmitic acid                                                 | 275.1389 | -0.634   | 0.644387318 |
| 2-Keto-D-gluconic acid                                                | 174.9581 | -0.21564 | 0.861164457 |
| 2-Methoxyestrone                                                      | 283.1779 | 0.131162 | 1.095175663 |
| 2-Oxazolidinone, 3-amino-5-(4-morpholinylmethyl)-                     | 203.1425 | 0.440225 | 1.356815545 |
| 3,2',4',5'-Tetramethoxyflavone                                        | 343.0324 | -0.31256 | 0.805212802 |
| 3,3',7,8-Tetramethoxyflavone                                          | 344.1055 | -0.49426 | 0.709924274 |
| 3,4,5-Trimethoxyamphetamine                                           | 226.1793 | -0.29145 | 0.817082791 |
| 3,4,5-Trimethoxycinnamic acid                                         | 239.1564 | -0.33383 | 0.7934254   |
| 3',4'-Dimethoxy-3-hydroxy-6-methylflavone                             | 314.1003 | -0.43249 | 0.740979682 |
| 3,5,7,3',4'-Pentahydroxyflavanone                                     | 305.1606 | -0.25236 | 0.839522169 |
| 3,5-Dihydroxybenzyl alcohol                                           | 141.0912 | -0.15927 | 0.895475931 |
| 3',5'-Dihydroxyflavone                                                | 255.1161 | -0.22816 | 0.853720663 |
| 3,6,2',4'-Tetrahydroxyflavone                                         | 288.2164 | -0.70178 | 0.614812674 |
| 3,6-Dimethyl-4-methoxycoumarin                                        | 205.085  | -0.4109  | 0.75215436  |
| 3,7-Dihydroxy-12-oxocholanoic acid                                    | 387.2    | 0.241846 | 1.182504874 |
| 3,7-Dihydroxy-3',4'-dimethoxyflavone                                  | 314.0867 | -0.29348 | 0.815929561 |
| 3,7-Dimethyl-9-(2,6,6-trimethylcyclohex-1-enyl)nona-2,4,6,8-tetraenoi | 282.9071 | 1.547706 | 2.923518139 |
| 3.alpha.,7.alpha.,12.alpha.-Trihydroxycholestanoic acid               | 413.2652 | 0.28155  | 1.215500154 |
| 3.beta.-14,16.beta.-Trihydroxy-5.beta.-bufa-20,22-dienolide           | 349.1848 | 0.160134 | 1.11739065  |
| 3-[(3-Cholamidopropyl)dimethylammonio]-1-propanesulfonate             | 615.4043 | 0.358055 | 1.281696569 |

|                                                                      |          |          |             |
|----------------------------------------------------------------------|----------|----------|-------------|
| 3-Dehydroquinic acid                                                 | 189.094  | -0.42729 | 0.743655043 |
| 3-Hydroxy-3-(2-(2-hydroxyphenyl)-2-oxoethyl)-1,3-dihydro-2H-indol-2- | 283.2629 | -0.17177 | 0.887752248 |
| 3-Hydroxy-3-methylglutaric acid                                      | 185.1146 | 0.358703 | 1.282272705 |
| 3-Hydroxy-6,2',4'-trimethoxyflavone                                  | 329.1976 | 0.499296 | 1.413523954 |
| 3-Hydroxy-7,3',4',5'-tetramethoxyflavone                             | 359.109  | 0.527459 | 1.441388141 |
| 3-Hydroxy-7,8,2'-trimethoxyflavone                                   | 329.197  | 0.439902 | 1.356511862 |
| 3-Hydroxy-7,8,3'-trimethoxyflavone                                   | 330.129  | -0.33251 | 0.79415273  |
| 3'-Hydroxy-D-sepiapterin                                             | 253.2135 | -0.2336  | 0.85050779  |
| 3-Indoleacetic acid                                                  | 176.0702 | -0.28459 | 0.820975308 |
| 3-Methoxyprostaglandin F1.alpha.                                     | 369.2652 | -0.1578  | 0.896389711 |
| 3-Ureidopropionic acid                                               | 132.0306 | 1.331854 | 2.517258716 |
| 4,5-Dehydrodocosaehaenoic Acid                                       | 327.2511 | -0.13473 | 0.910842861 |
| 4',7-Dimethoxy-8-methylisoflavone                                    | 297.0823 | 0.214533 | 1.160328654 |
| 4,7-Dimethyl-3-(4-methoxyphenyl)coumarin                             | 281.2206 | -0.12332 | 0.918072451 |
| 4-Androsten-3.alpha.-ol-17-one                                       | 271.1866 | -0.42546 | 0.744602398 |
| 4-Androstene-3,17-dione                                              | 309.2407 | 0.170373 | 1.125349046 |
| 4-Hydrazinobenzenesulfonic acid                                      | 81.033   | 0.694498 | 1.618321155 |
| 4'-Hydroxy-6-methylflavone                                           | 251.1853 | -0.35665 | 0.780977686 |
| 4-Hydroxyhexenal                                                     | 114.0921 | -0.45086 | 0.731604426 |
| 4-Imidazolecarboxaldehyde                                            | 112.0507 | -0.17867 | 0.883517723 |
| 5-(3,5-Dimethoxybenzylidene)-2-thioxo-1,3-thiazolidin-4-one          | 283.0143 | 0.460032 | 1.375572087 |
| 5(6)-EpETE methyl ester                                              | 315.1346 | -0.22267 | 0.85697711  |
| 5-(Galactosylhydroxy)-L-lysine                                       | 325.1614 | 0.46883  | 1.383986401 |
| 5(S),14(R)-Lipoxin B4                                                | 352.3369 | -0.28393 | 0.821353002 |
| 5(S),6(R),15(R)-Lipoxin A4                                           | 334.183  | -0.45999 | 0.7269897   |
| 5(Z),8(Z),11(Z)-Eicosatrienoic acid methyl ester                     | 321.1299 | -0.37621 | 0.770457156 |
| 5,16-Pregnadien-3.beta.-ol-20-one                                    | 315.1851 | -0.19919 | 0.871038092 |
| 5,6-DiHETE                                                           | 318.2268 | -0.31712 | 0.802670252 |
| 5,7-Dimethoxy-4-methylcoumarin                                       | 222.1149 | 0.119599 | 1.086432895 |
| 5.alpha.-Hydroxy-6-ketocholesterol                                   | 418.2804 | -0.18389 | 0.880327113 |
| 5.alpha.-Pregnan-3.alpha.-ol-11,20-dione                             | 314.2682 | 0.403082 | 1.32232957  |
| 5-Aminolevulinic acid                                                | 114.0926 | -0.4898  | 0.712122896 |
| 5-Aminouracil                                                        | 129.0545 | -0.77798 | 0.583183684 |
| 5-Aminovaleric acid                                                  | 100.0773 | -0.45806 | 0.727963143 |
| 5-Androsten-3.beta.-ol-17-one                                        | 271.19   | -0.1153  | 0.923189554 |
| 5-Hydroxyflavone                                                     | 239.0776 | -0.28894 | 0.818500775 |
| 5-Pregnen-3.beta.-ol-20-one                                          | 299.2579 | -0.29466 | 0.815265268 |
| 5S-Hydroxy-6E,8Z,11Z-eicosatrienoic acid                             | 305.2477 | 0.304143 | 1.234684687 |
| 5-trans U-44069                                                      | 332.2173 | 0.105124 | 1.075587113 |
| 5-trans-Prostaglandin F2.alpha.                                      | 337.2381 | -0.26808 | 0.830423241 |
| 6,7,3',4'-Tetramethoxyisoflavone                                     | 344.2398 | -0.22477 | 0.855731842 |
| 6,7-Dihydroxycoumarin-4-acetic acid                                  | 237.1483 | -0.19639 | 0.872733007 |
| 6,7-Dimethoxy-4-ethylcoumarin                                        | 236.2226 | 0.08678  | 1.061997443 |
| 6.beta.-Hydroxytestosterone                                          | 304.1756 | -0.20958 | 0.864790896 |
| 6.beta.-Testosterone enanthate                                       | 399.2515 | -0.36378 | 0.777128212 |
| 6-Ketoprostaglandin E1                                               | 351.0986 | 0.249684 | 1.188946804 |
| 6-Ketoprostaglandin F1.alpha.                                        | 353.2328 | -0.28412 | 0.821242869 |

|                                                                |          |          |             |
|----------------------------------------------------------------|----------|----------|-------------|
| 7,8,2'-Trihydroxyflavone                                       | 268.1893 | -0.44659 | 0.733775438 |
| 7,8,3',4'-Tetrahydroxyflavone                                  | 285.1181 | -0.24344 | 0.844728719 |
| 7,8,4'-Trimethoxyisoflavone                                    | 314.0957 | -0.46082 | 0.726573141 |
| 7.alpha.,27-Dihydroxycholesterol                               | 441.2371 | -0.32492 | 0.798342853 |
| 7-Aminonitrazepam                                              | 253.007  | -0.32514 | 0.79822124  |
| 7-Dimethylamino-4-methylcoumarin                               | 205.1198 | 0.103799 | 1.074599311 |
| 7-Hydroxy-3-methylflavone                                      | 253.2167 | -0.21716 | 0.860255756 |
| 7-Keto-8-aminopelargonic acid                                  | 185.0576 | 0.282947 | 1.216677338 |
| 7-Methoxy-4-methylcoumarin                                     | 190.012  | 0.164213 | 1.120554417 |
| 7-Methoxycoumarin-4-acetic acid                                | 236.1647 | -0.29525 | 0.814930555 |
| 8(9)-EET ethanolamide                                          | 345.1075 | 0.351126 | 1.275555724 |
| 8(S),15(S)-DiHETE                                              | 273.1103 | -0.31246 | 0.805266236 |
| 8,11,14-Eicosatriynoic acid                                    | 299.2192 | -0.20395 | 0.868169756 |
| 8-Chloro-1-octanol                                             | 165.0757 | -1.41591 | 0.374772546 |
| 9(11),(5.alpha.)-Androsten-3.beta.-ol-17-one                   | 288.2151 | 0.120867 | 1.087387963 |
| 9(11),(5.beta.)-Pregnen-3,20-dione                             | 316.2843 | 0.430577 | 1.347772794 |
| 9,11-Didehydrooestriol                                         | 269.2106 | -0.15993 | 0.895070014 |
| 9,11-Dioxo-15S-hydroxy-5Z,13E-prostadienoic acid               | 315.1562 | 0.186965 | 1.138366041 |
| 9-Hydroxy-5Z,7E,11Z,14Z-eicosatetraenoic acid                  | 302.2314 | -0.35079 | 0.784156327 |
| 9-Octadecenamide, (Z)-                                         | 282.2794 | 0.143457 | 1.10454892  |
| 9-Oxo-11R,15S,20-trihydroxy-5Z,13E-prostadienoic acid          | 351.2188 | -0.22838 | 0.853595461 |
| 9-Oxo-15S-hydroxy-10Z,13E-prostadienoic acid-cyclo[8S,12S]     | 319.1899 | -0.20002 | 0.870540114 |
| 9-Oxo-15S-hydroxy-5Z,10Z,13E,17Z-prostatetraenoic acid         | 315.1938 | -0.23356 | 0.850532325 |
| 9-Oxo-15S-hydroxy-5Z,8(12),13E,17Z-prostatetraenoic acid       | 333.2066 | -0.2624  | 0.833702744 |
| 9S,11,15S-Trihydroxythrombox-13E-enoic acid                    | 300.1509 | 0.102429 | 1.073579304 |
| 9S,11R,15S-Trihydroxy-13E-prostaenoic acid                     | 337.1063 | -0.25245 | 0.839469818 |
| 9S,11R,15S-Trihydroxy-20a,20b-dihomo-5Z,13E-prostadienoic acid | 365.1389 | -0.30615 | 0.808796977 |
| 9S,11R-Dihydroxy-15-oxoprostanoic acid                         | 304.1161 | 0.250799 | 1.189865923 |
| 9S,11R-Epidioxy-15S-hydroperoxy-5Z,13E-prostadienoic acid      | 355.2488 | -0.3447  | 0.787470785 |
| 9S,15S-Dihydroxy-11-oxothromboxa-5Z,13E,17Z-trienoic acid      | 349.2001 | -0.31162 | 0.80573697  |
| 9S,15S-Dihydroxy-5Z,13E-prostadienoic acid                     | 319.2281 | 0.321258 | 1.24941923  |
| Acetyl-DL-carnitine                                            | 204.1231 | 1.028072 | 2.039297405 |
| Acipimox                                                       | 110.0717 | 0.920628 | 1.892938798 |
| Acitretin                                                      | 309.2054 | 0.211104 | 1.157573345 |
| Adenosine 5'-triphosphate                                      | 347.0279 | 0.650691 | 1.5699199   |
| Adenylyl(3'-5')cytidine                                        | 573.1467 | 0.352391 | 1.276674861 |
| Alpinetin                                                      | 167.1168 | -0.51542 | 0.699591256 |
| Amodiaquin                                                     | 357.1041 | 0.499386 | 1.413611848 |
| Androst-4-en-3-one, 17- (1-oxopropoxy)-, (17.beta.)-           | 289.1069 | -0.5285  | 0.693276531 |
| Androstane-3,17-diol, (3.alpha.,5.alpha.,17.beta.)-            | 274.1841 | -0.4482  | 0.732954631 |
| Arachidonoyl amide                                             | 305.1278 | -0.28125 | 0.822877896 |
| Arachidonoyl-1-thioglycerol                                    | 305.2474 | 0.297192 | 1.228750575 |
| Araguspongin B                                                 | 236.1638 | -0.29756 | 0.813626481 |
| Atenolol                                                       | 267.1686 | -0.72709 | 0.60412292  |
| Azelaic acid                                                   | 188.1275 | 0.246407 | 1.186249492 |
| Batyl alcohol                                                  | 345.1045 | 1.21884  | 2.327594903 |
| Bavachinin                                                     | 321.1317 | -0.53996 | 0.687789229 |

|                                            |          |          |             |
|--------------------------------------------|----------|----------|-------------|
| Beclomethasone                             | 337.106  | 0.136935 | 1.099566346 |
| Benzenamine, N,N-dimethyl-                 | 122.097  | 0.29673  | 1.228357321 |
| Benzeneethanol, 2-hydroxy-                 | 120.0804 | 0.278609 | 1.213025028 |
| Benzoic acid, 4-hydroxy-                   | 121.0424 | -0.35234 | 0.783314463 |
| Benzyl butyl phthalate                     | 313.1444 | -0.25054 | 0.840583375 |
| Bicyclo[2.2.1]heptane-2-methanol           | 109.1022 | -0.35364 | 0.782608853 |
| Bilobalide                                 | 308.2268 | -0.15799 | 0.896269924 |
| Bimatoprost diethylamide                   | 335.221  | 0.433678 | 1.350672836 |
| Bimatoprost isopropyl ester                | 353.2286 | -0.28956 | 0.818150153 |
| Biotin                                     | 245.1003 | -0.55708 | 0.679678235 |
| Bisphenol A bis(2,3-dihydroxypropyl) ether | 394.2235 | 0.125055 | 1.090549202 |
| Bolasterone                                | 299.2582 | -0.28887 | 0.818543598 |
| Boldenone                                  | 269.2102 | -0.20304 | 0.868720218 |
| Budesonide                                 | 430.2672 | -0.19052 | 0.876292493 |
| Buflomedil                                 | 309.2434 | 0.119898 | 1.086658406 |
| Calcipotriol                               | 394.2968 | 0.353256 | 1.277440069 |
| Cantharidin                                | 197.1525 | -0.31309 | 0.804914041 |
| Carbaprostacyclin                          | 315.2545 | 0.198327 | 1.147367424 |
| Carboxyibuprofen                           | 219.1345 | -0.30324 | 0.810430106 |
| CAY10410                                   | 301.0049 | -0.34181 | 0.789050386 |
| Ceftriaxone                                | 555.0539 | 0.563386 | 1.477733195 |
| Cholest-5-ene-3.beta.,22(S)-diol           | 384.0351 | -0.38229 | 0.767219592 |
| Cholest-5-ene-3.beta.,4.beta.-diol         | 384.2965 | -0.37866 | 0.769153419 |
| Cholesta-4,6-dien-3-one                    | 383.3333 | -0.24658 | 0.84289253  |
| Cholesta-5,7-dien-3-ol, (3.beta.)-         | 384.2203 | -0.17593 | 0.885194063 |
| Cholic acid                                | 373.2006 | -0.35265 | 0.783143417 |
| Ciprofibrate                               | 270.1632 | 0.446367 | 1.362604542 |
| cis-10-Heptadecenoic acid                  | 269.2478 | -0.11487 | 0.923464375 |
| cis-4,10,13,16-Docosatetraenoic acid       | 333.2798 | 0.343253 | 1.268614081 |
| cis-4,7,10,13,16,19-Docosahexaenoic acid   | 329.2477 | 0.285096 | 1.218491299 |
| cis-5,8,11,14-Eicosatetraenoic acid        | 305.2473 | 0.301153 | 1.232128548 |
| cis-5,8,11-Eicosatrienoic acid             | 329.2333 | -0.30313 | 0.81049002  |
| cis-7,10,13,16-Docosatetraenoic acid       | 333.2985 | 0.417179 | 1.335313608 |
| cis-7-Hexadecenoic acid methyl ester       | 269.2105 | -0.22713 | 0.854329859 |
| cis-Vaccenic acid                          | 283.1873 | -0.24343 | 0.844737365 |
| Clasto-lactacystin .beta.-lactone          | 234.9814 | -0.45118 | 0.731444958 |
| Coenzyme Q1                                | 251.1606 | -0.10803 | 0.927852041 |
| Colchicine                                 | 399.1746 | -0.09282 | 0.937689595 |
| Conjugated linoleic acid (9E,11E)          | 263.2367 | 0.350374 | 1.274891136 |
| Corilagin                                  | 317.1142 | 0.126165 | 1.091388953 |
| Cortisone                                  | 343.1739 | -0.35786 | 0.780322537 |
| Cuminaldehyde                              | 149.0595 | 0.145857 | 1.106387652 |
| Cyclopentasiloxane, decamethyl-            | 371.1036 | 0.604143 | 1.520075758 |
| Cyclopropanecarboxylic acid, 1-amino-      | 102.056  | 0.200515 | 1.14910885  |
| Cytidine                                   | 243.1094 | 0.338912 | 1.264802763 |
| Cytidine 5'-diphosphocholine               | 489.1148 | 0.456924 | 1.372612095 |
| Cytosine                                   | 112.0869 | 2.758718 | 6.767946234 |

|                                             |          |          |             |
|---------------------------------------------|----------|----------|-------------|
| D-(-)-Ribose                                | 133.0328 | 0.245407 | 1.185426902 |
| D-(+)-Mannose                               | 360.1523 | -0.3051  | 0.809388384 |
| D-(+)-Trehalose                             | 325.1136 | -0.7178  | 0.608022545 |
| Decapropylene glycol monobutyl ether        | 656.0063 | -0.56069 | 0.677976624 |
| D-erythro-C18-Sphingosine                   | 283.1033 | -0.24654 | 0.84291363  |
| Desogestrel                                 | 311.2205 | -0.1739  | 0.886440236 |
| Dexpanthenol                                | 206.1383 | 0.404715 | 1.323827309 |
| D-Fructose 1,6-bisphosphate                 | 217.0682 | 0.411462 | 1.330032569 |
| D-Glucosyl-.beta.1-1'-D-erythro-sphingosine | 253.2631 | -0.20572 | 0.867107125 |
| D-Glucuronic acid                           | 177.0064 | -0.60978 | 0.65529877  |
| Dibutyl adipate                             | 259.1905 | 0.347112 | 1.272012021 |
| Dihydroartemisinin                          | 267.1233 | -0.15718 | 0.896779228 |
| Dihydrouracil                               | 229.1293 | -0.48614 | 0.7139311   |
| Dimethipin                                  | 210.1149 | -0.58997 | 0.664357432 |
| Dimethylfraxetin                            | 175.0213 | -0.27433 | 0.8268323   |
| Dimetridazole                               | 141.0664 | 0.484636 | 1.399232356 |
| Dinitramine                                 | 323.0554 | 0.403292 | 1.322522085 |
| Dinor-12-oxophytodienoic Acid               | 265.2152 | -0.23901 | 0.847324327 |
| DL-2,3-Diaminopropionic acid                | 88.0408  | 0.237997 | 1.179354504 |
| DL-Arginine                                 | 175.1192 | -1.82168 | 0.282891387 |
| DL-Lysine, 5-hydroxy-                       | 163.1087 | 0.43827  | 1.354978911 |
| DL-Methionine                               | 150.0589 | 0.27154  | 1.207095486 |
| D-Mannitol                                  | 183.0864 | -0.55954 | 0.678519624 |
| D-myo-Inositol-4-phosphate                  | 261.0378 | -0.21796 | 0.859782382 |
| Docosahexaenoic acid ethyl ester            | 357.2783 | -0.29848 | 0.81310659  |
| Docosatetraenoyl ethanolamide               | 357.2754 | -0.16479 | 0.892056183 |
| Dodecanedioic acid                          | 213.1487 | -0.28715 | 0.819518156 |
| Dodecanoic acid                             | 182.9631 | -0.28555 | 0.820431404 |
| Donepezil                                   | 380.2232 | 0.387812 | 1.308407852 |
| D-Psicose                                   | 181.0836 | 0.599726 | 1.515428461 |
| D-Pyroglutamic acid                         | 130.0504 | 0.351383 | 1.275782869 |
| D-Quinovose                                 | 163.026  | 0.434899 | 1.351816119 |
| D-Sorbitol                                  | 183.0859 | -0.91104 | 0.531802483 |
| Dulcitol                                    | 165.0883 | -0.91104 | 0.531802483 |
| Eicosapentaenoic acid ethyl ester           | 331.0807 | -1.01091 | 0.496232399 |
| Eicosapentaenoyl ethanolamide               | 345.1025 | 1.203022 | 2.302214873 |
| Enrofloxacin                                | 332.1394 | -0.71899 | 0.607521217 |
| ent-Corey PG-Lactone diol                   | 250.1784 | -0.13524 | 0.910516173 |
| Enterodiol                                  | 303.1777 | 0.363013 | 1.286108709 |
| Enterolactone                               | 281.2954 | -0.28436 | 0.821104518 |
| Erythromycin                                | 716.4658 | -0.89672 | 0.537105621 |
| Estriol                                     | 253.2157 | -0.43341 | 0.740509725 |
| Estrone                                     | 271.225  | -0.30631 | 0.808706039 |
| Ethidimuron                                 | 114.0911 | 0.275015 | 1.210006344 |
| Ethyl 7-hydroxycoumarin-4-carboxylate       | 207.1112 | -0.29677 | 0.814072538 |
| Fenthion sulfoxide                          | 262.1414 | -0.24936 | 0.841270637 |
| Finasteride                                 | 318.1706 | -0.62237 | 0.649601842 |

|                                |          |          |             |
|--------------------------------|----------|----------|-------------|
| Flumethasone pivalate          | 374.2129 | 0.400661 | 1.320112978 |
| Fluocinolone acetonide         | 337.1043 | -0.22161 | 0.857607551 |
| Fluorometholone                | 341.1858 | 0.344399 | 1.269622138 |
| Flurandrenolide                | 341.2666 | -0.20184 | 0.869441017 |
| Fluvastatin                    | 395.2404 | -0.31295 | 0.804993627 |
| Formestane                     | 285.0943 | 0.331581 | 1.258391879 |
| Fumonisin B2                   | 337.2701 | 0.315407 | 1.244362526 |
| Gemfibrozil                    | 250.1779 | 0.28849  | 1.221360899 |
| Genistein                      | 271.1889 | -0.09252 | 0.93788573  |
| Glucoheptonic acid             | 225.0569 | -0.45036 | 0.731860292 |
| Glycan Chitobiose              | 288.0789 | 0.287377 | 1.220419665 |
| Glycan Lacto-N-biose           | 384.1512 | 0.378231 | 1.299747378 |
| Glycan Le-X Trisaccharide      | 530.2123 | -0.33512 | 0.79271594  |
| Glycan N-Acetylglucosamine     | 384.1537 | 0.540337 | 1.454312042 |
| Glycerol 1-stearate            | 359.3162 | 0.199149 | 1.148021002 |
| Glycodeoxycholic acid          | 414.3026 | 0.410291 | 1.328953976 |
| Glycoursodeoxycholic acid      | 432.3114 | 0.358235 | 1.28185649  |
| Glycyl-L-norleucine            | 189.0726 | -0.3638  | 0.7771176   |
| Granisetron                    | 139.1226 | -0.5033  | 0.705492992 |
| Guanidinosuccinic acid         | 176.0663 | 0.704691 | 1.62979528  |
| Heptadecanoyl ethanolamide     | 297.1687 | 0.923122 | 1.896213697 |
| Heptadecaspheing-4-enine       | 269.2108 | -0.29865 | 0.81301101  |
| Heptapropylene glycol          | 425.3125 | -0.21541 | 0.861303409 |
| Hexapropylene glycol           | 367.2702 | -0.1954  | 0.873329435 |
| Hydrocortisone                 | 363.2155 | 0.645643 | 1.564436932 |
| Hydromorphone                  | 286.1416 | -1.13594 | 0.455038628 |
| I-BOP                          | 351.0973 | -0.41737 | 0.748787133 |
| Iloprost                       | 325.1992 | -0.24255 | 0.845250694 |
| Indole-3-pyruvic acid          | 203.035  | -0.28962 | 0.818115778 |
| Inosine, 2'-deoxy-             | 270.108  | -0.22885 | 0.853313799 |
| iPF2.alpha.-IV                 | 336.2079 | 0.270775 | 1.206455983 |
| Isopentenyl pyrophosphate      | 251.1278 | -0.13509 | 0.910615352 |
| Isopimaric acid                | 285.094  | 0.284677 | 1.218137678 |
| Isosorbide                     | 147.0637 | -1.08546 | 0.471243596 |
| Jasmonic acid                  | 211.1323 | -0.38596 | 0.765267823 |
| Ketogluconic acid methyl ester | 209.1376 | 0.19051  | 1.141167054 |
| L-(+)-Gulose                   | 181.0842 | 0.600081 | 1.51580196  |
| L-Arabinitol                   | 175.1443 | -0.58322 | 0.66747388  |
| L-Arginine                     | 175.1191 | 0.257923 | 1.195756113 |
| L-Asparagine                   | 116.0348 | 0.233449 | 1.175642324 |
| Latrunculin B                  | 359.1082 | -0.38585 | 0.765328048 |
| L-Canavanine                   | 159.0272 | -0.24754 | 0.842331522 |
| L-Carnitine                    | 162.1116 | 2.307592 | 4.95056078  |
| L-Citrulline                   | 176.104  | 0.473771 | 1.388734623 |
| Leukotriene B3                 | 275.1952 | -0.0921  | 0.938158485 |
| Leukotriene B4                 | 319.2253 | -0.27272 | 0.827759134 |
| Leukotriene D4 methyl ester    | 391.0128 | -0.21641 | 0.860706803 |



|                                                               |          |          |             |
|---------------------------------------------------------------|----------|----------|-------------|
| L-Fucitol                                                     | 167.0902 | -0.42174 | 0.746524488 |
| L-Glutamine                                                   | 130.0507 | -0.3603  | 0.779005057 |
| Linoleic acid                                                 | 281.2462 | -0.83702 | 0.559797643 |
| L-Isoleucine                                                  | 132.1031 | 0.442983 | 1.359411934 |
| L-Lysine                                                      | 130.0867 | 0.230535 | 1.173269588 |
| L-Methionine                                                  | 150.0581 | 0.273507 | 1.208742917 |
| Lobeline                                                      | 109.0771 | 0.96451  | 1.95140099  |
| Loratadine                                                    | 383.1535 | -0.31883 | 0.801719342 |
| L-Pipecolic acid                                              | 130.0868 | 0.231304 | 1.173895775 |
| L-Proline                                                     | 116.0349 | 0.234184 | 1.176241178 |
| Lysine, butyl ester                                           | 204.1345 | 1.502619 | 2.83356705  |
| Maltitol                                                      | 345.139  | -0.69134 | 0.61928047  |
| Mefluidide                                                    | 136.0482 | 2.299376 | 4.922447927 |
| Mesterolone                                                   | 305.1965 | -0.10917 | 0.927120479 |
| Methimazole                                                   | 116.0349 | 0.234184 | 1.176241178 |
| Methyl .beta.-D-galactopyranoside                             | 195.1218 | -0.2113  | 0.863760753 |
| Methyl 7-hydroxycoumarin-4-acetate                            | 234.9496 | -0.21688 | 0.860421502 |
| Methyl jasmonate                                              | 175.0404 | -0.29773 | 0.813531464 |
| Methyl myristoleate                                           | 241.1787 | -0.21065 | 0.864146908 |
| Methylprednisolone succinate                                  | 339.2698 | 0.256753 | 1.194786759 |
| Mifepristone                                                  | 413.2668 | 0.226104 | 1.169671671 |
| Misoprostol, free acid                                        | 351.2083 | -0.2532  | 0.839035549 |
| Mono-2-ethylhexyl phthalate                                   | 277.1805 | -0.20793 | 0.865778748 |
| Monoerucin                                                    | 321.1327 | -0.2104  | 0.864295773 |
| Monolinolenin (9c,12c,15c)                                    | 261.1364 | 0.268455 | 1.204517109 |
| Mononervonin (15c)                                            | 404.2689 | 0.168021 | 1.123515968 |
| Mono-n-octyl phthalate                                        | 277.1797 | -0.19656 | 0.872627215 |
| Myristic acid alkyne                                          | 109.1019 | -0.16034 | 0.894816743 |
| Myristoleic acid                                              | 227.1634 | -0.21956 | 0.858829671 |
| N-(11R,15S-Dihydroxy-9-oxo-5Z,13E-prostadienoyl)-ethanolamine | 377.3244 | 0.223166 | 1.167292568 |
| N-(8Z,11Z,14Z-Eicosatrienoyl)ethanolamine                     | 331.2249 | 0.186609 | 1.138085312 |
| N(G),N(G')-Dimethyl-L-arginine                                | 225.184  | -0.40444 | 0.755527025 |
| N.alpha.-(tert-Butoxycarbonyl)-L-Histidine                    | 255.1468 | 0.499554 | 1.41377666  |
| N.alpha.-Acetyl-L-lysine                                      | 189.1225 | -0.50491 | 0.70470386  |
| N.epsilon.-Acetyl-L-lysine                                    | 189.1233 | -0.53878 | 0.688350955 |
| N.epsilon.-Methyl-L-lysine                                    | 161.1291 | 0.788162 | 1.726873279 |
| N1-Acetylspermine                                             | 266.1525 | -0.53541 | 0.689961069 |
| N-3-Oxododecanoyl-L-homoserine lactone                        | 197.1509 | -0.30831 | 0.807587944 |
| N-3-Oxotetradec-7Z-enoyl-L-homoserine lactone                 | 205.0864 | -0.36358 | 0.777230962 |
| N-Acetyl-D-glucosamine                                        | 204.0874 | 0.592792 | 1.508162481 |
| N-Acetyl-D-glucosamine 6-phosphate                            | 324.0456 | 0.377806 | 1.299364752 |
| N-Acetyl-D-lactosamine                                        | 384.1507 | 0.375071 | 1.296903413 |
| N-Acetyl-D-mannosamine                                        | 204.0862 | 0.590771 | 1.506050935 |
| N-Acetylglucosaminylasparagine                                | 336.1418 | 0.262326 | 1.199411085 |
| N-Acetyl-L-aspartic acid                                      | 176.0553 | 0.714219 | 1.640594617 |
| N-Acetylneuraminic Acid, 2,3-Dehydro-2-deoxy-                 | 274.0927 | 0.460783 | 1.376288821 |
| Nalbuphine                                                    | 357.1515 | 0.607253 | 1.523355382 |

|                                              |          |          |             |
|----------------------------------------------|----------|----------|-------------|
| Nandrolone                                   | 257.1359 | -0.32238 | 0.799748661 |
| N-Cyclohexanecarbonylpentadecylamine         | 338.0669 | -0.24536 | 0.843605488 |
| Nicotine                                     | 163.1233 | -0.33407 | 0.793296626 |
| Nicotinic acid adenine dinucleotide          | 664.1226 | -0.63388 | 0.644441821 |
| Nilotinib                                    | 266.1485 | 0.949144 | 1.930726746 |
| Nis(monooleoylglycero)phosphate (S,R Isomer) | 441.0468 | 0.228464 | 1.171586949 |
| N-Methyl-D-aspartic acid                     | 148.062  | 0.341304 | 1.266901277 |
| N-Methyl-D-glucamine                         | 129.0398 | 2.022194 | 4.062009388 |
| N-Methylnicotinic acid cation                | 138.0552 | 0.658217 | 1.578131024 |
| N-n-Butylpropionamide                        | 130.1597 | -0.43616 | 0.739097966 |
| Nobiletin                                    | 403.2416 | 0.459866 | 1.375414312 |
| Nonapropylene glycol                         | 541.3982 | -0.25074 | 0.840467467 |
| Nonapropylene glycol monobutyl ether         | 597.9586 | -0.55849 | 0.679012629 |
| Norcodeine                                   | 267.1351 | -0.33799 | 0.791142135 |
| Norethindrone                                | 299.2003 | -0.32049 | 0.800795318 |
| N-Undecanoyl-L-homoserine lactone            | 253.2144 | -0.2185  | 0.859457639 |
| O-2545                                       | 275.1714 | -0.27794 | 0.824768358 |
| Octadec-9-enoic acid butyl ester             | 265.2536 | -0.48096 | 0.716499495 |
| Ofloxacin                                    | 362.1523 | -1.80456 | 0.286268524 |
| o-Phenylenediamine                           | 110.0275 | 0.474867 | 1.389790095 |
| Oxycodone                                    | 316.113  | -0.35501 | 0.781862803 |
| Palitantin                                   | 254.1381 | -0.34596 | 0.78678379  |
| Palmitamide                                  | 256.2644 | 0.198392 | 1.147418877 |
| Palmitoylcarnitine                           | 400.3418 | 0.470091 | 1.385196747 |
| Peimisine                                    | 427.1943 | -0.27005 | 0.829293673 |
| Pentadecanoic acid                           | 225.1499 | -0.15095 | 0.900657224 |
| Pentadecanoic acid, 14-methyl-               | 257.1373 | -0.30774 | 0.807905448 |
| Phenol, 4-(2-aminoethyl)-                    | 120.081  | 0.305825 | 1.236125735 |
| Phenol, o-amino-                             | 110.0276 | 0.47538  | 1.390284807 |
| Phenprobamate                                | 179.0747 | -0.36381 | 0.777109705 |
| Phosphoric acid                              | 116.035  | 0.231345 | 1.173928566 |
| Phthalic anhydride                           | 149.0233 | -0.35849 | 0.779983107 |
| Phytanic acid                                | 110.0098 | 0.139552 | 1.101562773 |
| Phytomonic acid                              | 298.2752 | -0.14687 | 0.903205067 |
| Phytosphingosine                             | 281.2489 | -0.213   | 0.862742003 |
| Piceatannol                                  | 245.0993 | -0.52769 | 0.693662736 |
| Pinolenic acid                               | 278.2489 | -0.19671 | 0.872536026 |
| Pinolenic acid methyl ester                  | 261.1107 | -0.35095 | 0.784069423 |
| PIT-1                                        | 336.211  | 0.370614 | 1.292903221 |
| Prednisone                                   | 341.2685 | -0.24469 | 0.843999345 |
| Pregabalin                                   | 160.133  | 1.486973 | 2.803002974 |
| Prostaglandin A1 methyl ester                | 274.1459 | -0.29084 | 0.817426123 |
| Prostaglandin A2 methyl ester                | 331.0988 | -0.73782 | 0.599644892 |
| Prostaglandin D1 alcohol                     | 322.97   | 0.277254 | 1.211886019 |
| Prostaglandin E1                             | 338.0489 | 0.131203 | 1.095206764 |
| Prostaglandin E1 alcohol                     | 305.2456 | 0.275199 | 1.210161384 |
| Prostaglandin E1 ethanolamide                | 379.1916 | -0.37958 | 0.768659641 |

|                                                 |          |          |             |
|-------------------------------------------------|----------|----------|-------------|
| Prostaglandin E2 p-benzamidophenyl ester        | 281.2206 | -0.28133 | 0.822830876 |
| Prostaglandin F2.alpha.                         | 335.2222 | 0.426283 | 1.34376698  |
| Prostaglandin F2.alpha. 1,9-lactone             | 319.2253 | -0.10765 | 0.92809839  |
| Prostaglandin F2.alpha. Alcohol                 | 305.1598 | -0.0869  | 0.941544104 |
| Prostaglandin F2.alpha. isopropyl ester         | 301.14   | -0.24495 | 0.843844297 |
| Prostaglandin H2                                | 335.1201 | -0.31079 | 0.806198067 |
| Prostaglandin K1                                | 289.0419 | 0.291506 | 1.223916951 |
| Pterostilbene                                   | 257.2103 | -0.20662 | 0.866562605 |
| p-Toluenesulfonic acid                          | 173.0784 | -0.31451 | 0.804123501 |
| Purmorphamine                                   | 262.1656 | 0.113433 | 1.081799272 |
| Pyridoxamine                                    | 169.0576 | -0.17513 | 0.885690513 |
| Quinestrol                                      | 296.1549 | -0.13399 | 0.91130894  |
| Quinine                                         | 325.1898 | -0.18642 | 0.878781822 |
| Resveratrol                                     | 229.1411 | -0.25741 | 0.836588934 |
| Retinoic acid                                   | 301.1401 | -0.24343 | 0.844737365 |
| Ricinoleic acid methyl ester                    | 295.1897 | -0.17928 | 0.883145294 |
| Ropinirole                                      | 261.1288 | -0.42037 | 0.747234919 |
| S-1 Methanandamide                              | 345.1035 | 1.172781 | 2.254459135 |
| Sclerotiorin                                    | 373.1989 | -0.38378 | 0.766428995 |
| Sebacic acid monomethyl ester                   | 199.1696 | -0.3834  | 0.766626304 |
| Sepiapterin                                     | 239.1563 | -0.30069 | 0.811866579 |
| Serotonin                                       | 177.1021 | 0.288466 | 1.221341298 |
| Sinapyl alcohol                                 | 211.0587 | 0.110146 | 1.079337649 |
| S-Lactoylglutathione                            | 402.1067 | 0.353149 | 1.277346115 |
| Stearidonic acid                                | 277.2164 | -0.21823 | 0.859618911 |
| Stearidonic acid ethyl ester                    | 305.128  | -0.21639 | 0.860717927 |
| Stearidonic acid methyl ester                   | 291.2557 | -0.31297 | 0.804982944 |
| Sucrose                                         | 325.1144 | -0.39276 | 0.761671679 |
| Taurine                                         | 376.0528 | 1.80208  | 3.487225477 |
| Tauroursodeoxycholic acid                       | 500.3075 | -0.25555 | 0.837666242 |
| Testosterone                                    | 289.2116 | -0.10556 | 0.929444168 |
| Tetradecanedioic acid                           | 241.1044 | -0.34144 | 0.789253278 |
| Tetradecanoyl coenzyme A                        | 160.0628 | -0.13937 | 0.907914686 |
| Tetrazepam                                      | 288.1908 | 0.154736 | 1.113217972 |
| Thiothixene                                     | 429.2392 | -0.15116 | 0.900523212 |
| Tibolone                                        | 313.2378 | -0.18149 | 0.881789054 |
| trans-.DELTA.2-11-Methyldodecenoic Acid         | 214.18   | -0.25997 | 0.835103305 |
| trans-13-Octadecenoic acid                      | 283.2617 | -0.2467  | 0.842822723 |
| trans-4-(Aminomethyl)cyclohexanecarboxylic acid | 158.1172 | -0.18165 | 0.881691567 |
| trans-8, trans-10-Dodecadien-1-ol               | 183.0859 | -0.34346 | 0.788150846 |
| trans-Androsterone                              | 273.1717 | 0.163251 | 1.119807553 |
| trans-Cinnamic acid                             | 131.05   | -0.47143 | 0.72124701  |
| trans-Traumatic acid                            | 227.1292 | -0.48702 | 0.71349906  |
| Tributyl phosphate                              | 533.3385 | 0.297426 | 1.228950179 |
| Trinexapac-ethyl                                | 253.2129 | -0.22412 | 0.856115472 |
| Tris(2-butoxyethyl) phosphate                   | 399.2519 | 0.877343 | 1.836989259 |
| Troxol                                          | 250.1792 | -0.44725 | 0.733440081 |

|                     |          |          |             |
|---------------------|----------|----------|-------------|
| Tryptamine          | 321.905  | 0.234598 | 1.176578508 |
| Undecanedioic acid  | 217.1035 | -0.37147 | 0.772994471 |
| Uracil              | 113.0349 | 0.727677 | 1.655970056 |
| Ureidosuccinic acid | 176.0557 | 0.638042 | 1.556215741 |
| Uridine, 5-methyl-  | 281.2479 | 0.140241 | 1.102089304 |
| Zearalenone         | 301.1397 | -0.71891 | 0.607557086 |
