# Supplementary material
Source: PubMed Central journal article supplement (PMC6571061)
Supplement: NIHMS1523810-supplement-13.pdf [file NIHMS1523810-supplement-13.pdf]

**Supplementary Table S5**

| Lipid Class | Fatty acid carbon chain length | No of Double Bonds | Chain Category | Saturation of Carbon | Mass (m/z) | Lipid Name       | Log Fold Change | Linear Fold Change |
|-------------|--------------------------------|--------------------|----------------|----------------------|------------|------------------|-----------------|--------------------|
| PE          | 32                             | 1                  | 20 to 40       | Monounsaturated      | 688.495    | PE 32:1          | 0.65215         | 1.571508325        |
| PS          | 40                             | 1                  | >= 40          | Monounsaturated      | 844.609    | PS 40:1          | -0.20197        | 0.869364265        |
| PI          | 36                             | 3                  | 20 to 40       | Polyunsaturated      | 859.541    | PI 36:3          | 0.335           | 1.26138029         |
| PS          | 38                             | 2                  | 20 to 40       | Polyunsaturated      | 814.563    | PS 38:2          | 0.22001         | 1.164738256        |
| PS          | 40                             | 2                  | >= 40          | Polyunsaturated      | 842.591    | PS 40:2          | -0.18598        | 0.879050462        |
| PI          | 32                             | 0                  | 20 to 40       | Saturated            | 809.516    | PI 32:0          | -0.52758        | 0.693715618        |
| PC          | 36                             | 3                  | 20 to 40       | Polyunsaturated      | 828.581    | PC 36:3          | -0.21438        | 0.861914189        |
| PS          | 40                             | 2                  | >= 40          | Polyunsaturated      | 842.591    | PS 40:2          | -0.1557         | 0.897698214        |
| plasmeyl    | 38                             | 1                  | 20 to 40       | Monounsaturated      | 756.66     | plasmeyl-PE 38:1 | -0.52864        | 0.693206723        |
| PC          | 35                             | 2                  | 20 to 40       | Polyunsaturated      | 830.591    | PC 35:2          | -0.24436        | 0.84418901         |
| PC          | 36                             | 2                  | 20 to 40       | Polyunsaturated      | 830.603    | PC 36:2          | -0.25194        | 0.839766317        |
| CL          | 72                             | 6                  | >= 40          | Polyunsaturated      | 726.538    | CL 72:6          | -0.22813        | 0.853741761        |
| PC          | 36                             | 3                  | 20 to 40       | Polyunsaturated      | 828.581    | PC 36:3          | -0.19757        | 0.872020609        |
| PC          | 36                             | 2                  | 20 to 40       | Polyunsaturated      | 830.603    | PC 36:2          | -0.20526        | 0.867383268        |
| CL          | 72                             | 9                  | >= 40          | Polyunsaturated      | 723.978    | CL 72:9          | -0.28976        | 0.818035465        |
| PS          | 38                             | 2                  | 20 to 40       | Polyunsaturated      | 814.563    | PS 38:2          | 0.25746         | 1.195375759        |
| TG          | 50                             | 0                  | >= 40          | Saturated            | 852.808    | TG 50:0          | -0.5562         | 0.680089705        |
| TG          | 56                             | 8                  | >= 40          | Saturated            | 925.723    | TG 56:8          | 0.61136         | 1.527702331        |
