# Supplementary material
Source: PubMed Central journal article supplement (PMC6571061)
Supplement: NIHMS1523810-supplement-16.pdf [file NIHMS1523810-supplement-16.pdf]

| <b>Supplementary Table S8</b> |                                      |
|-------------------------------|--------------------------------------|
| <b>BLCA Tissue samples</b>    |                                      |
|                               | <b>BLCA Patients Characteristics</b> |
| <b>Grade</b>                  | Low Grade (n=6;33.3%)                |
|                               | High Grade (n=12;66.6%)              |
| <b>Stage</b>                  | Ta (n=6; 33.3%)                      |
|                               | T3 (n=7; 38.8 %)                     |
|                               | T4 (n=5; 27.7 %)                     |
| <b>Gender</b>                 | n= 11(61%; Male)                     |
|                               | n=3(16.6%; Female)                   |
|                               | n=4(22.2%; missing)                  |
| <b>Smoking status</b>         | n=7 (38.8%; Non smoker)              |
|                               | n=11 (61%; smoker)                   |
| <b>Cohorts</b>                | Augusta (n= 14; 77.7%)               |
|                               | UTSW (n= 4; 23.3%)                   |
