# Supplementary material
Source: PubMed Central journal article supplement (PMC6571061)

A)

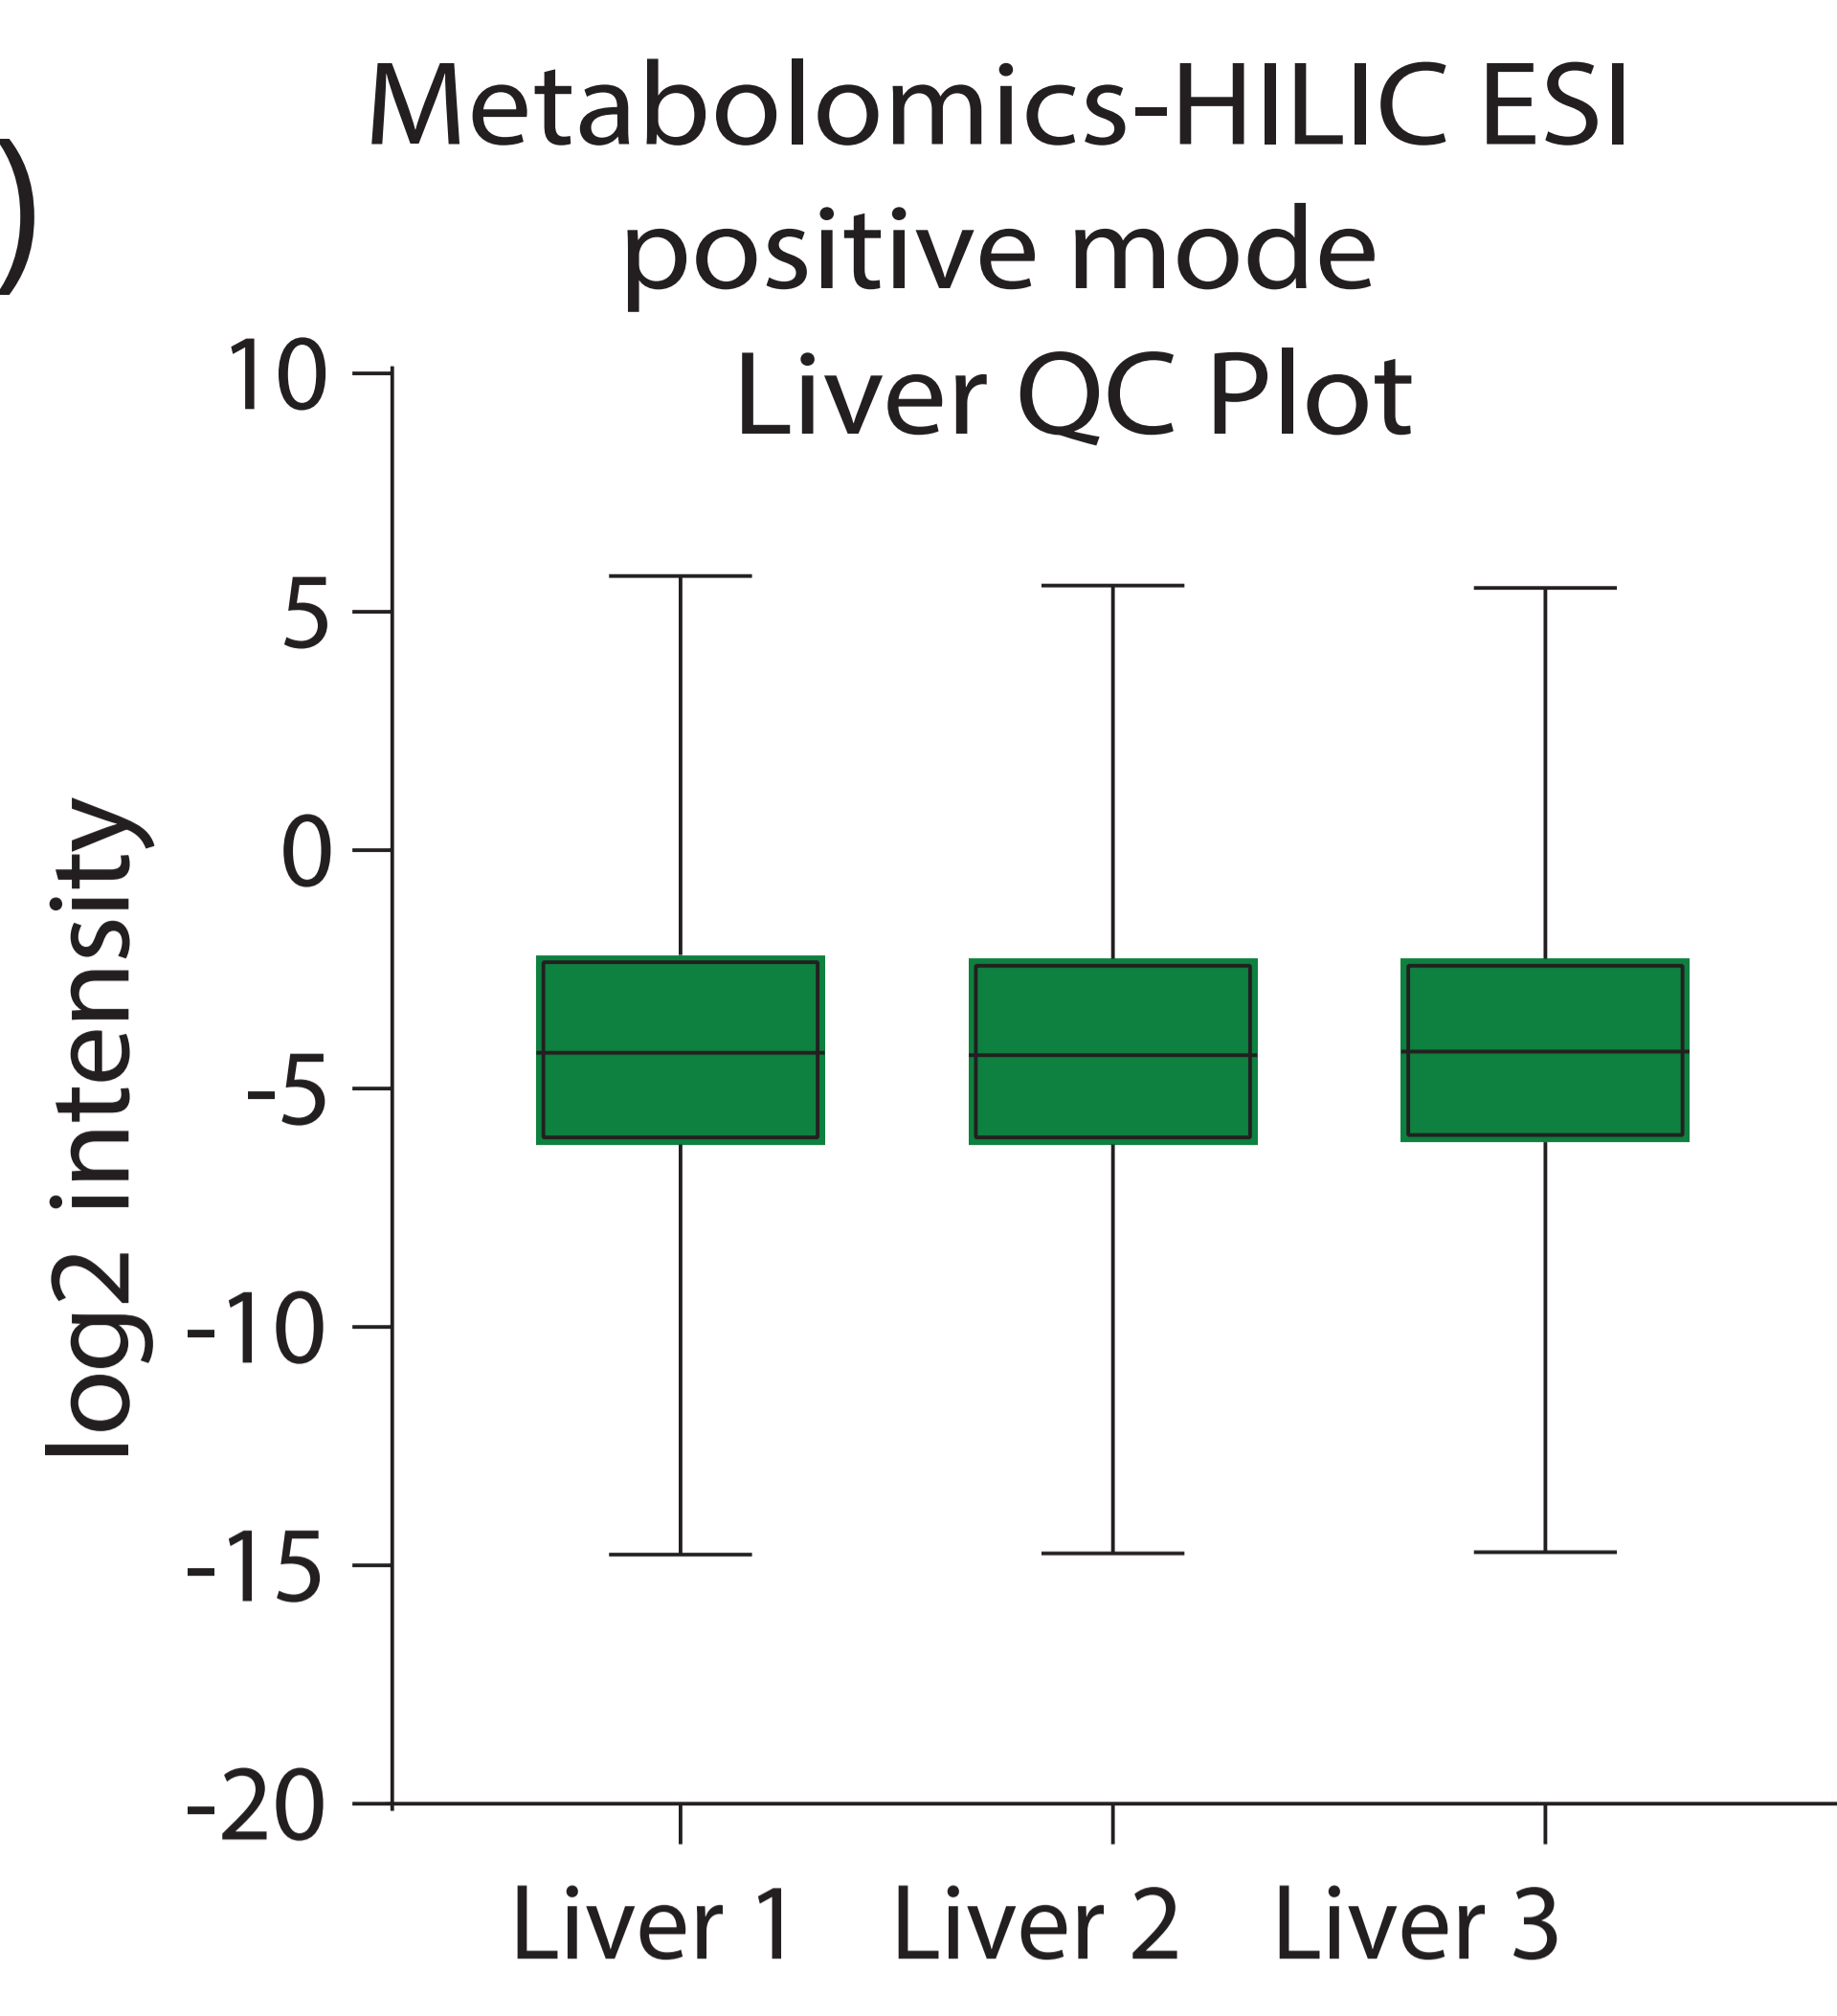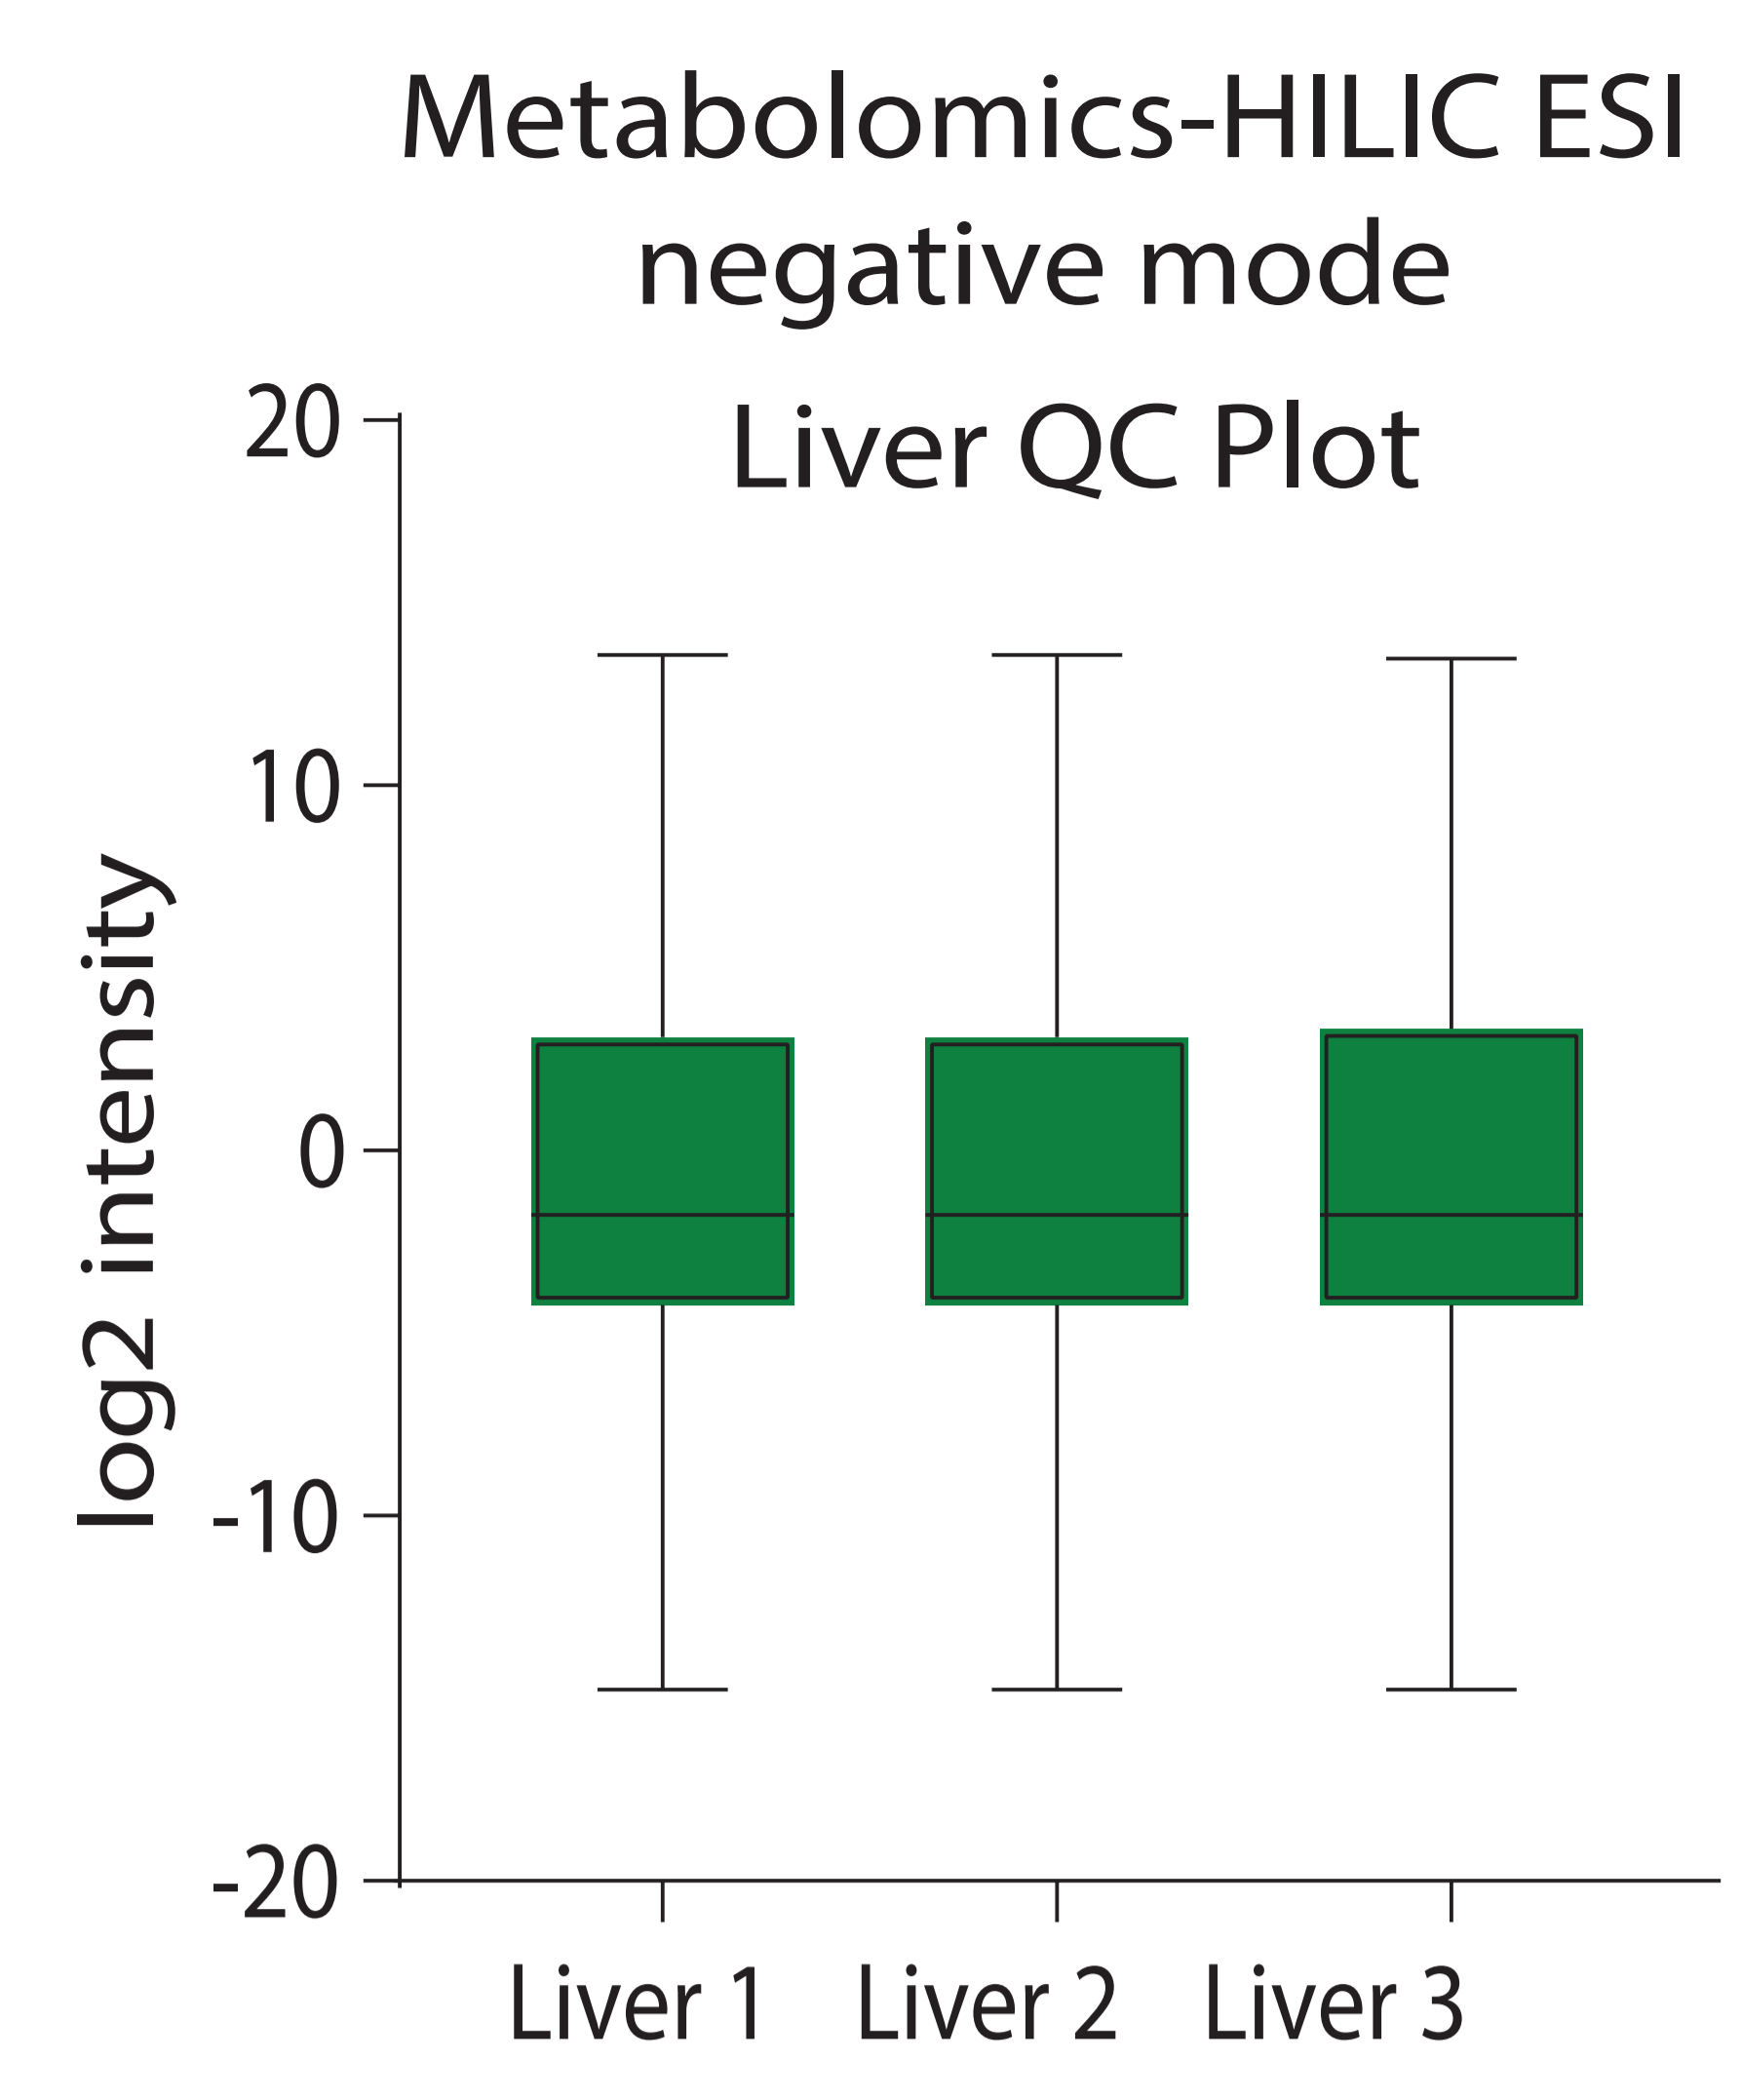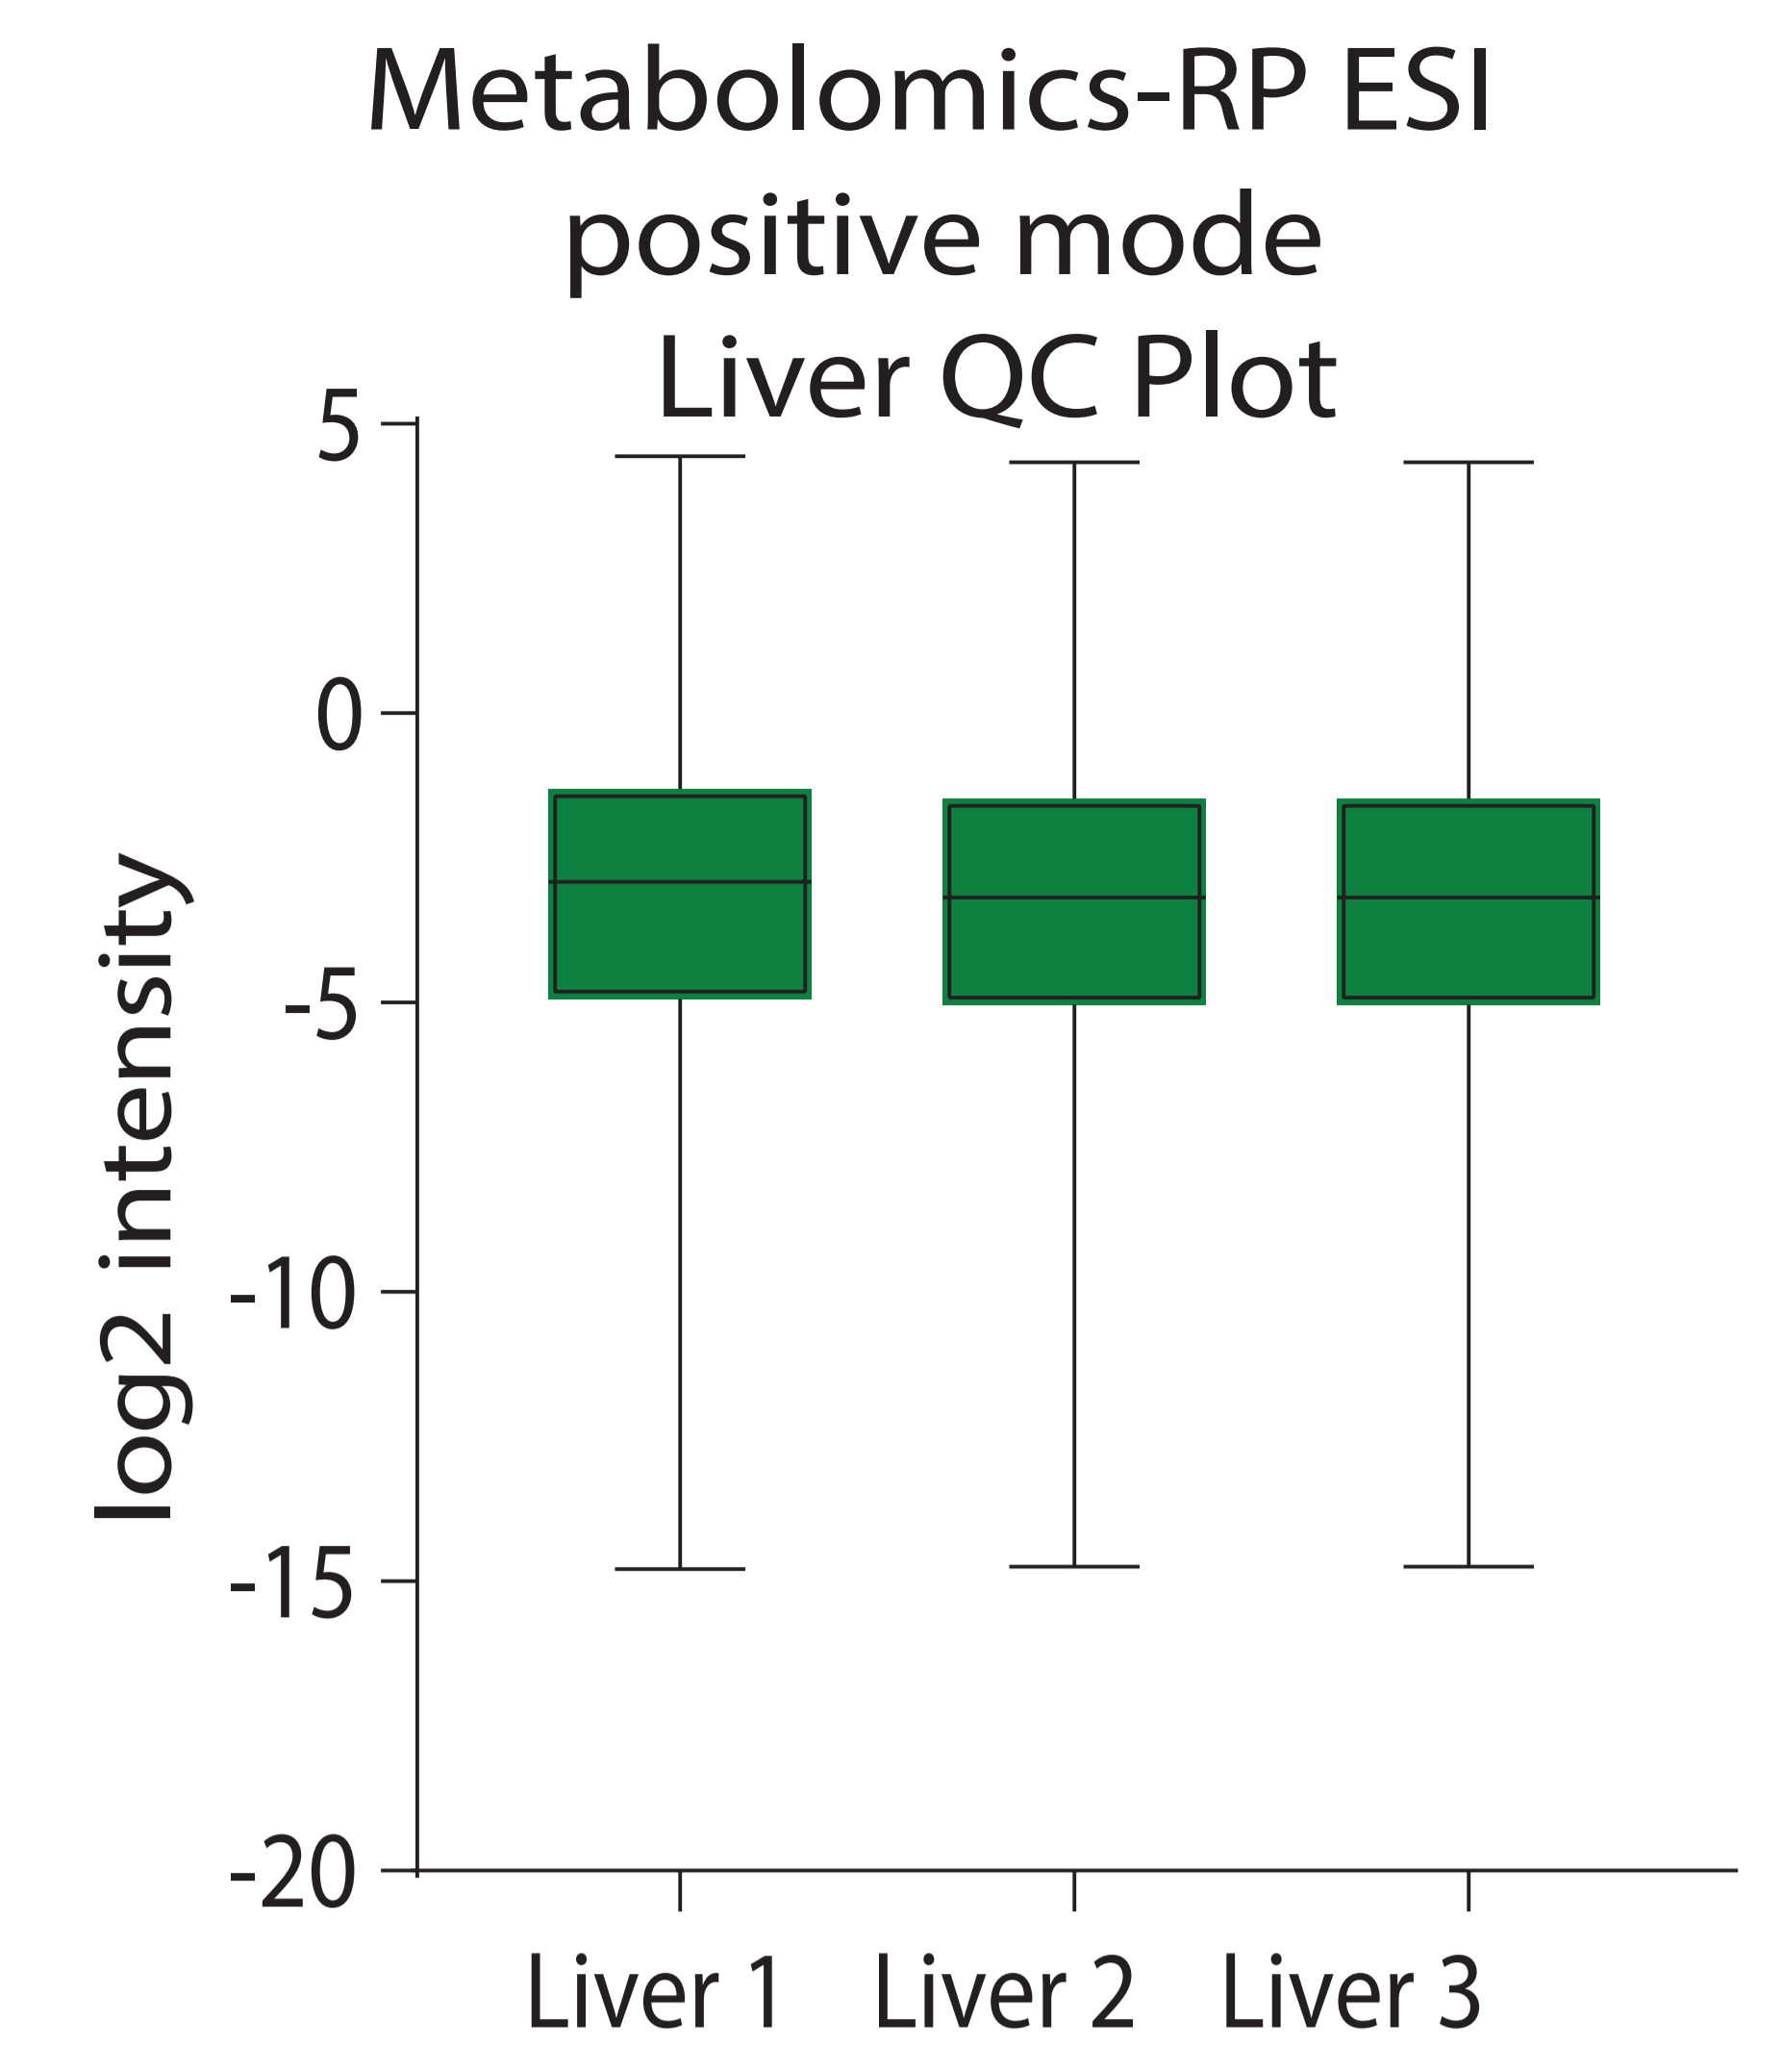

B)

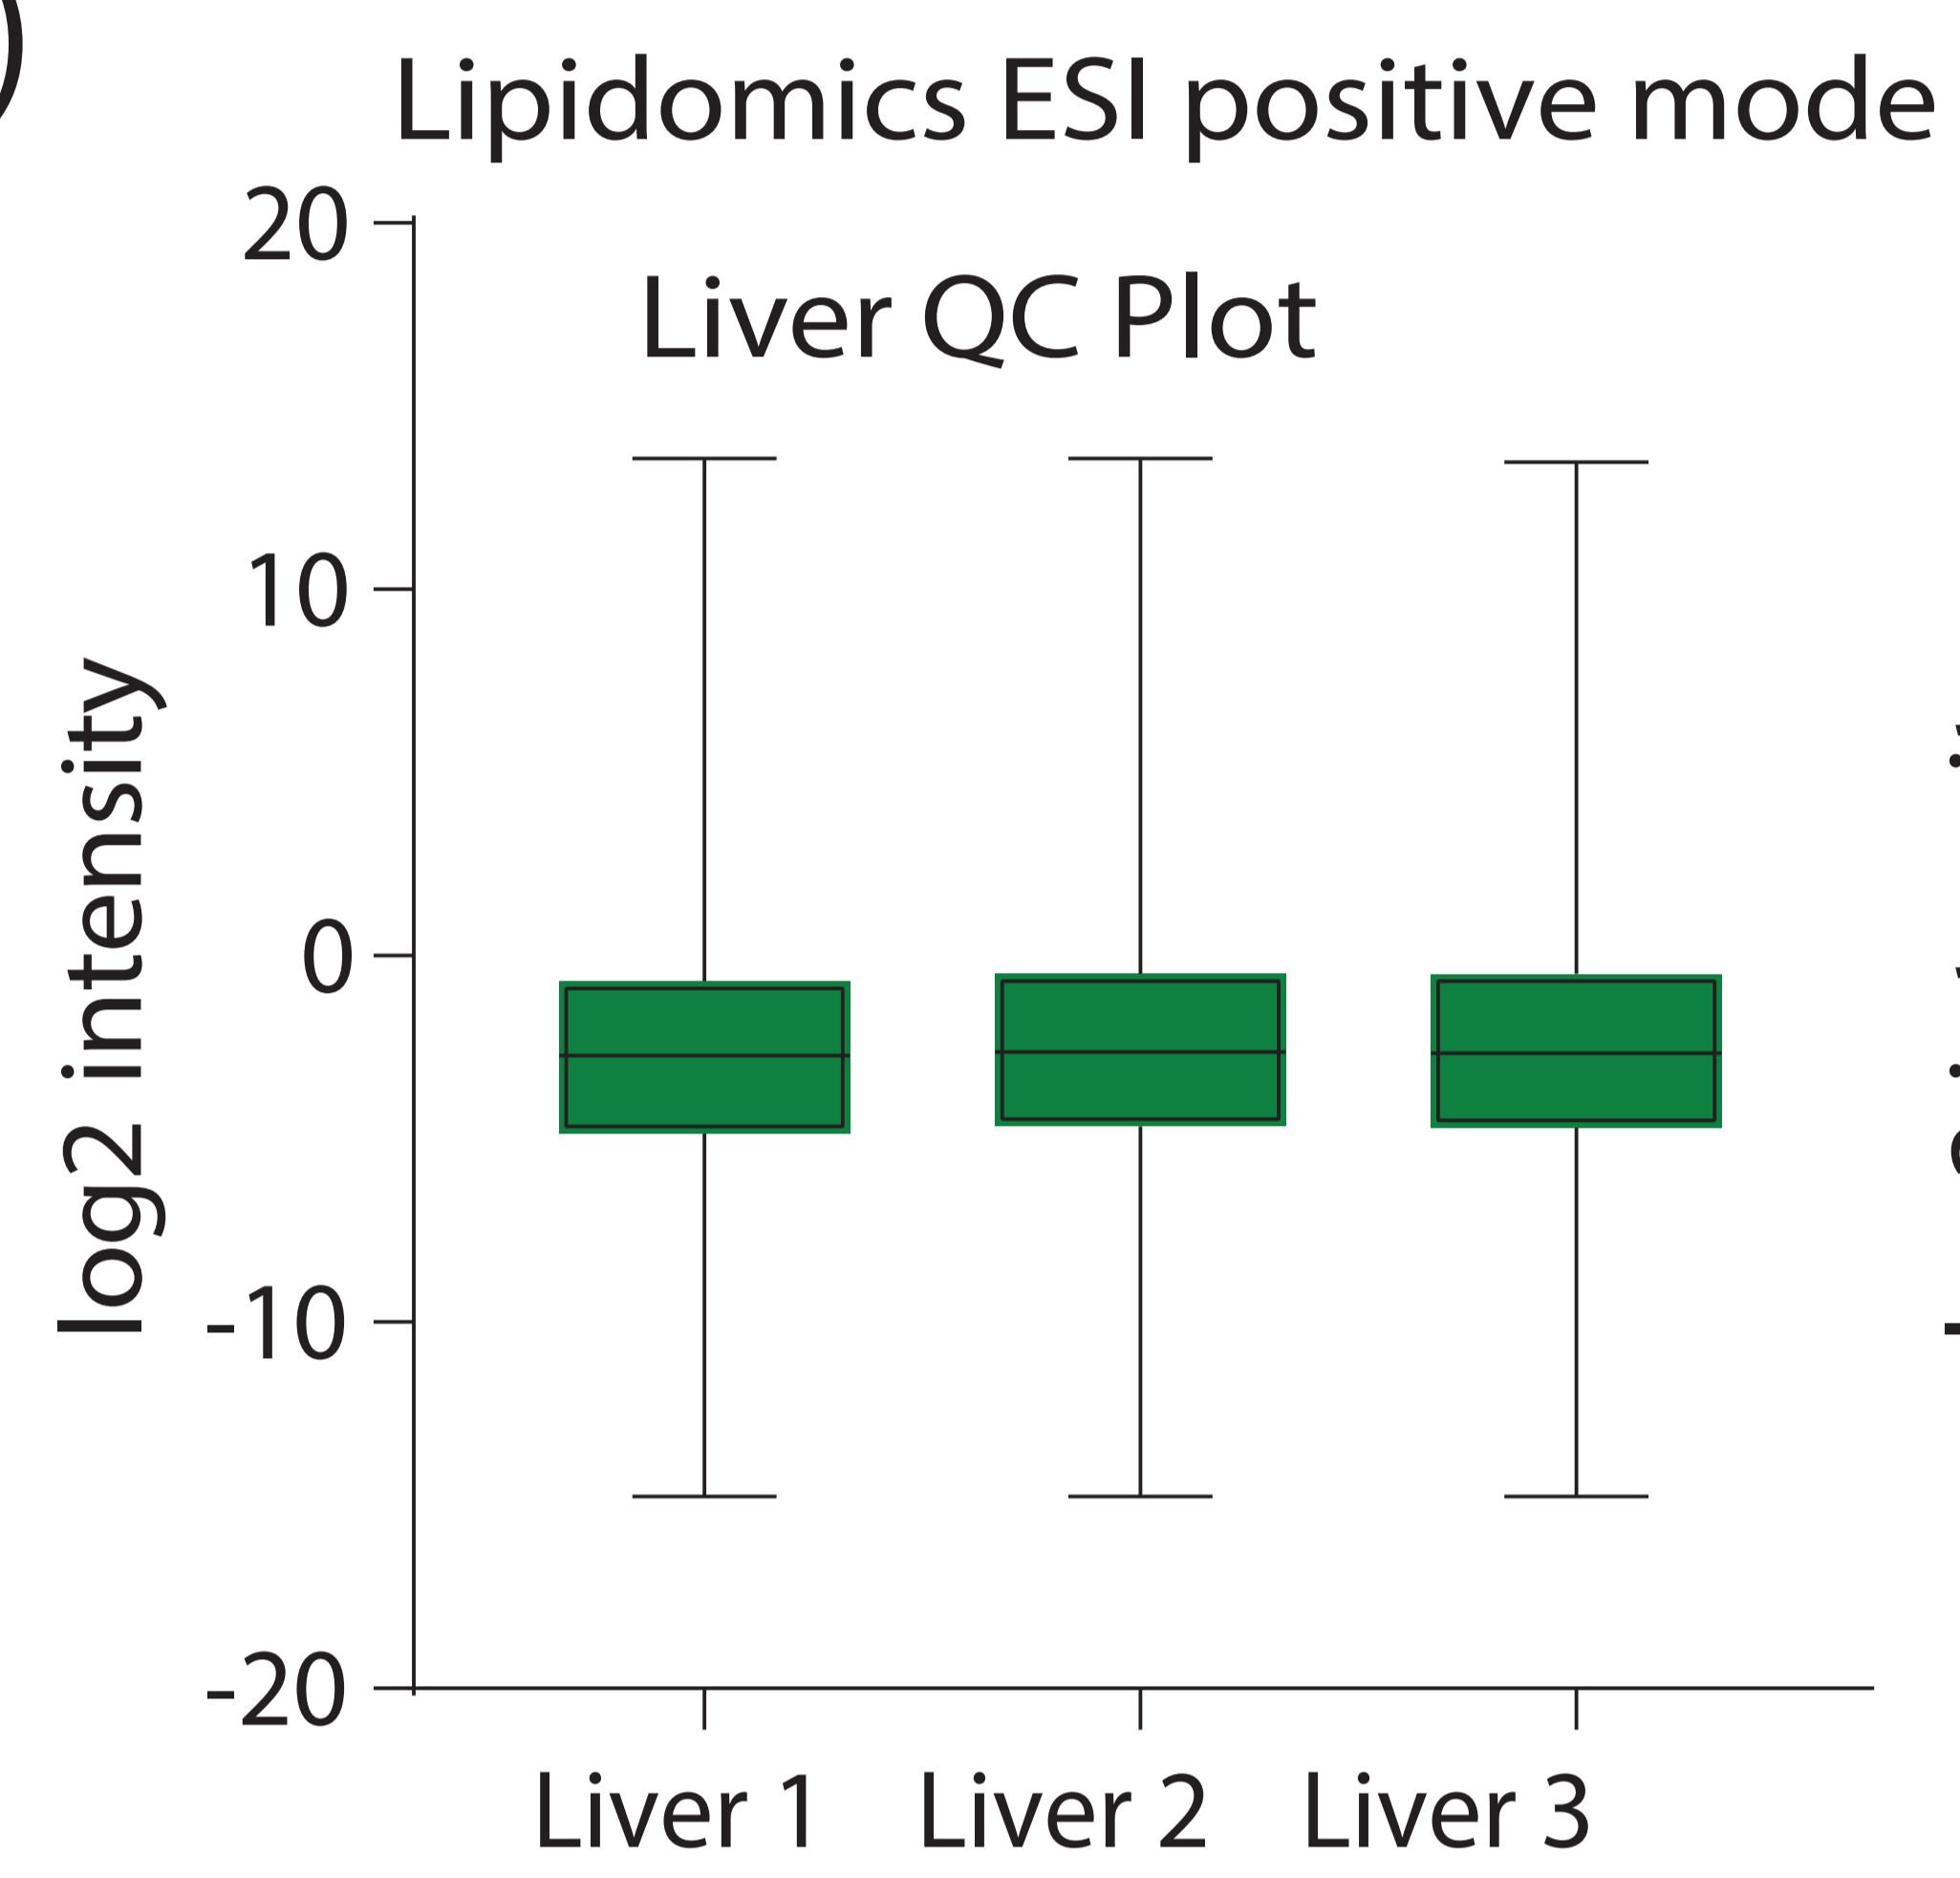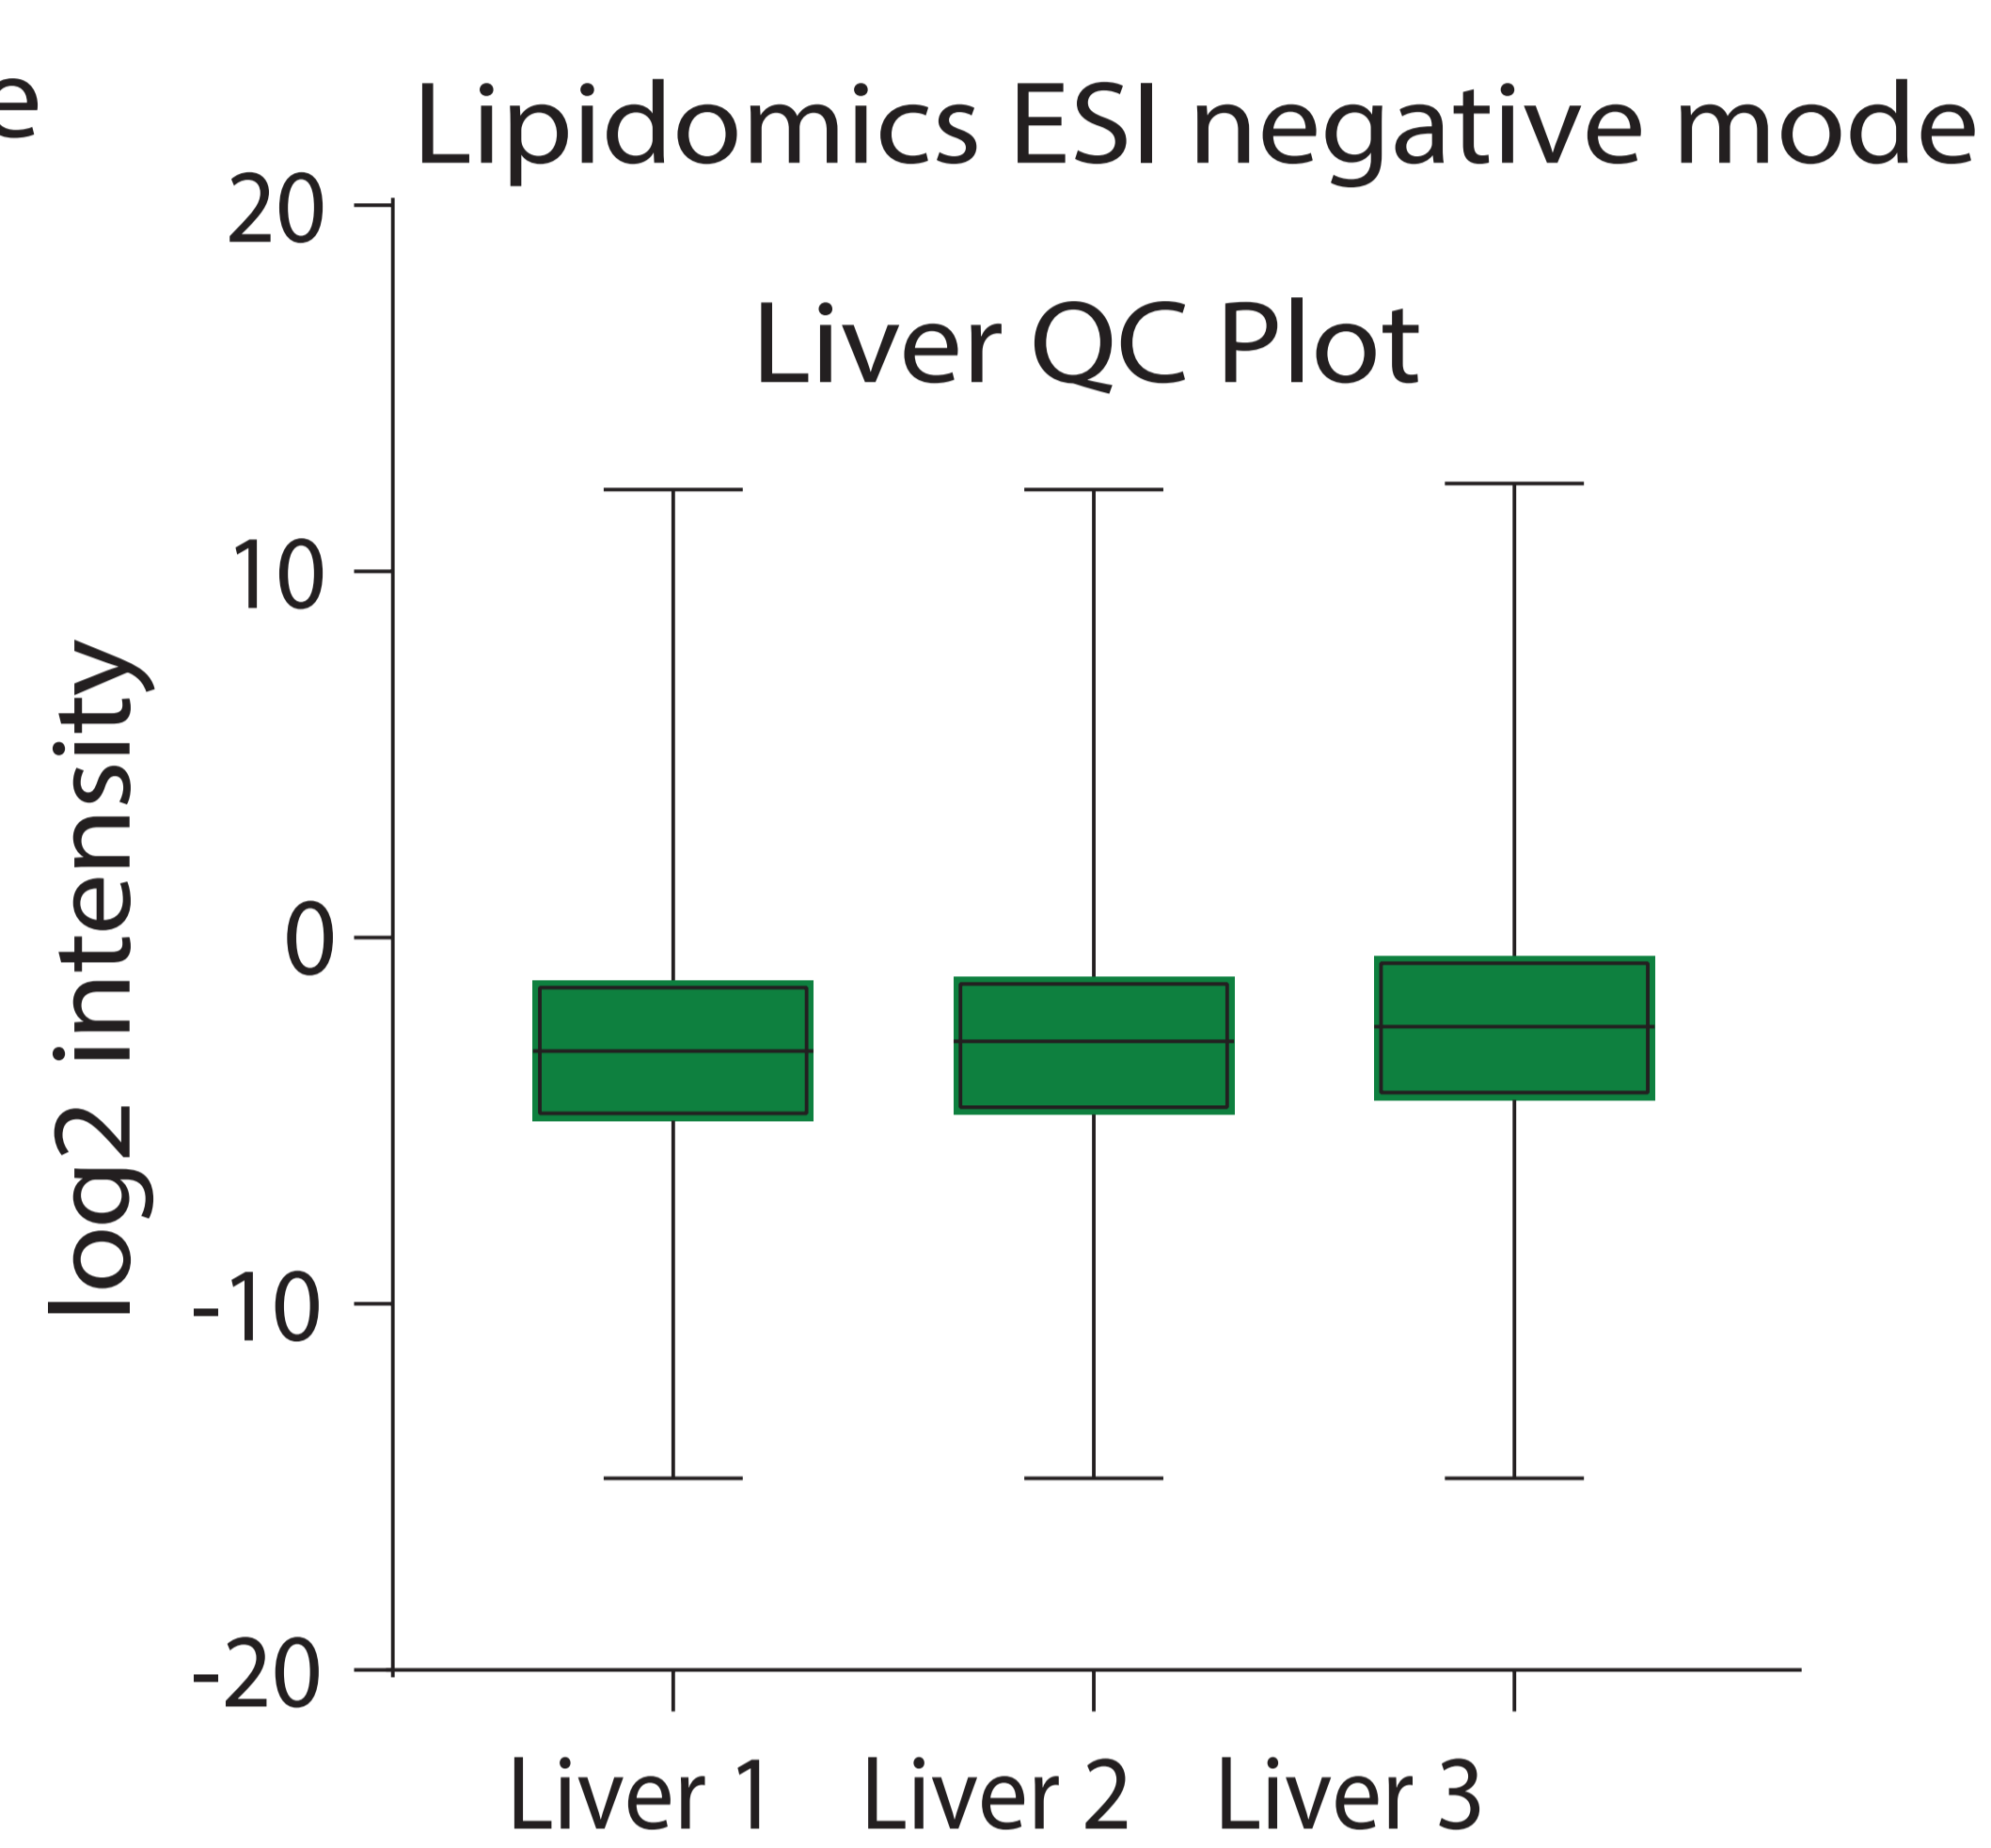

Supplementary Figure S1

Supplement: NIHMS1523810-supplement-1.pdf [file NIHMS1523810-supplement-1.pdf]

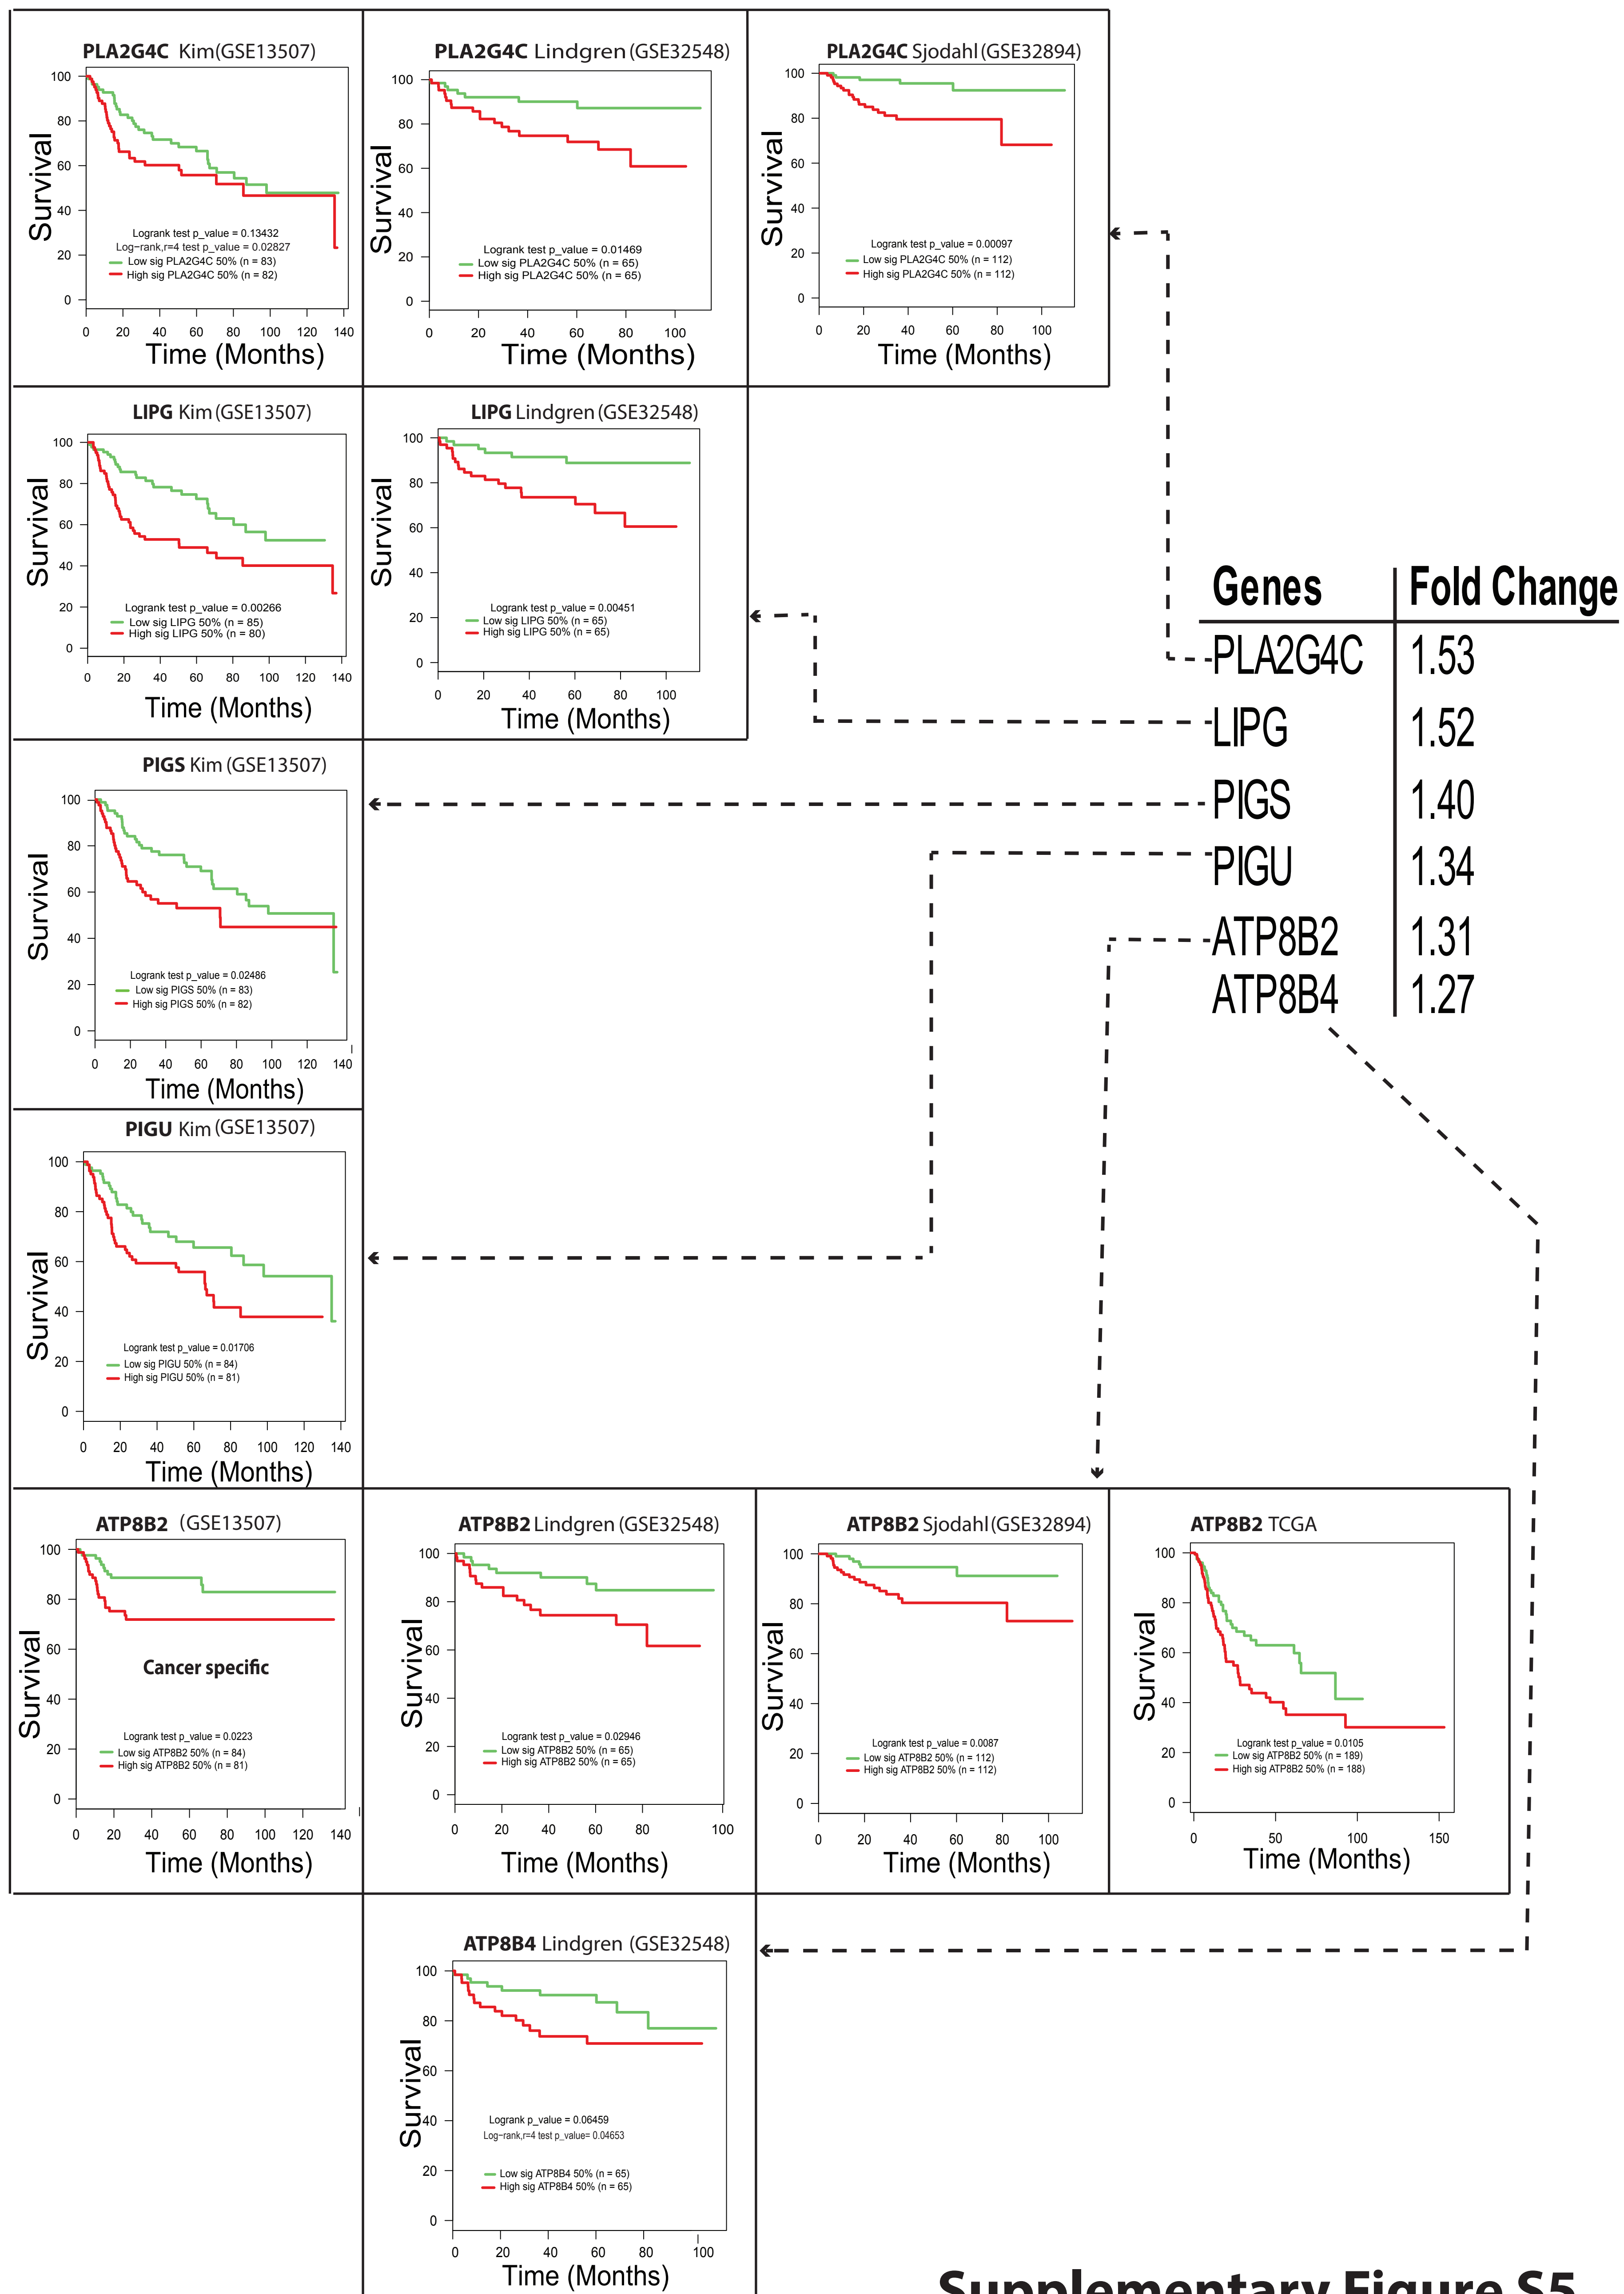

**Supplementary Figure S5**

Supplement: NIHMS1523810-supplement-5.pdf [file NIHMS1523810-supplement-5.pdf]

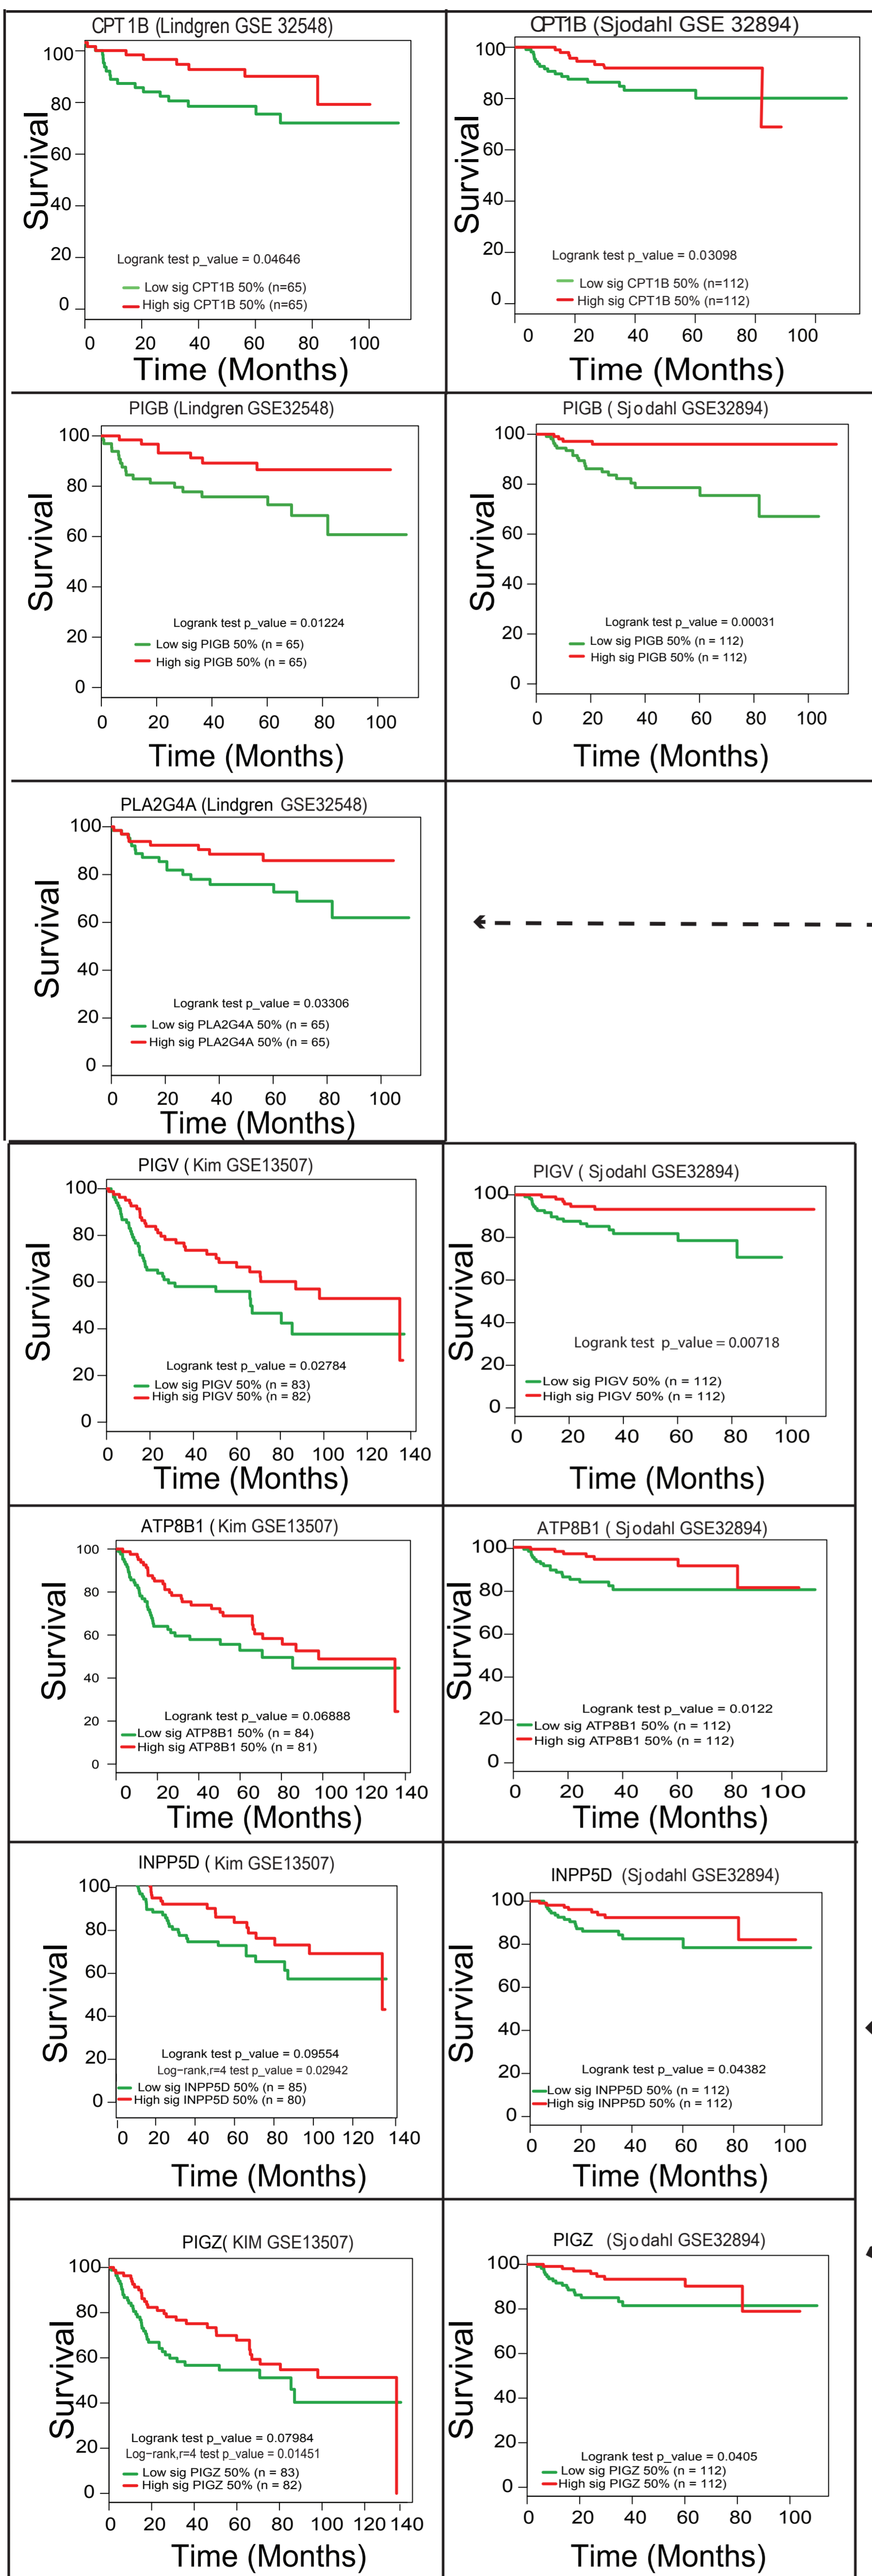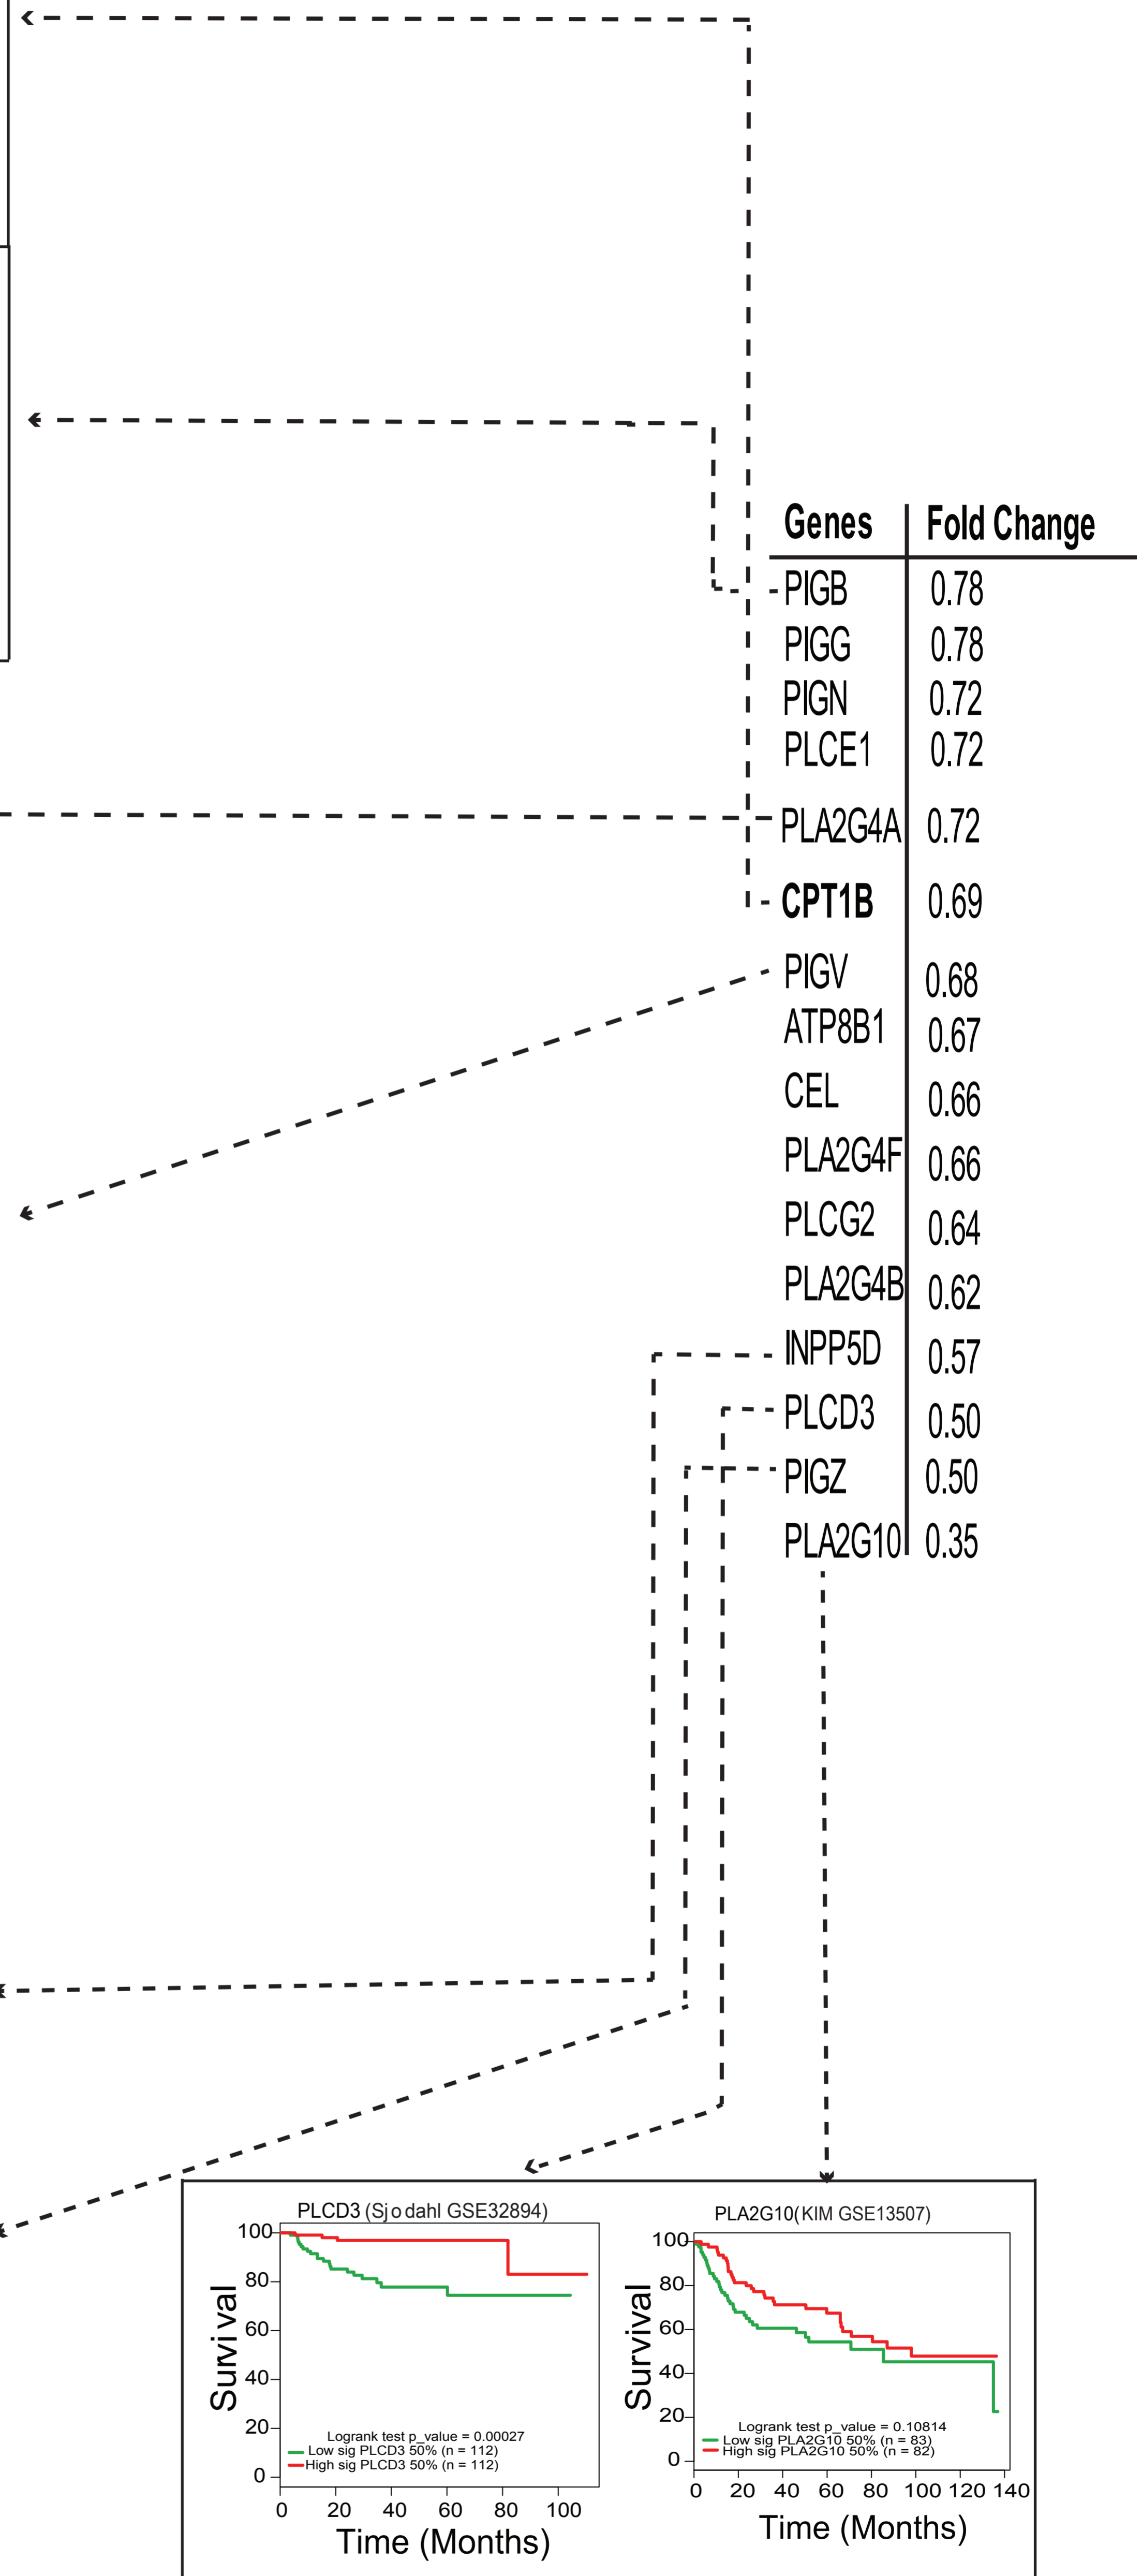

Supplementary Figure S6

Supplement: NIHMS1523810-supplement-6.pdf [file NIHMS1523810-supplement-6.pdf]

A)

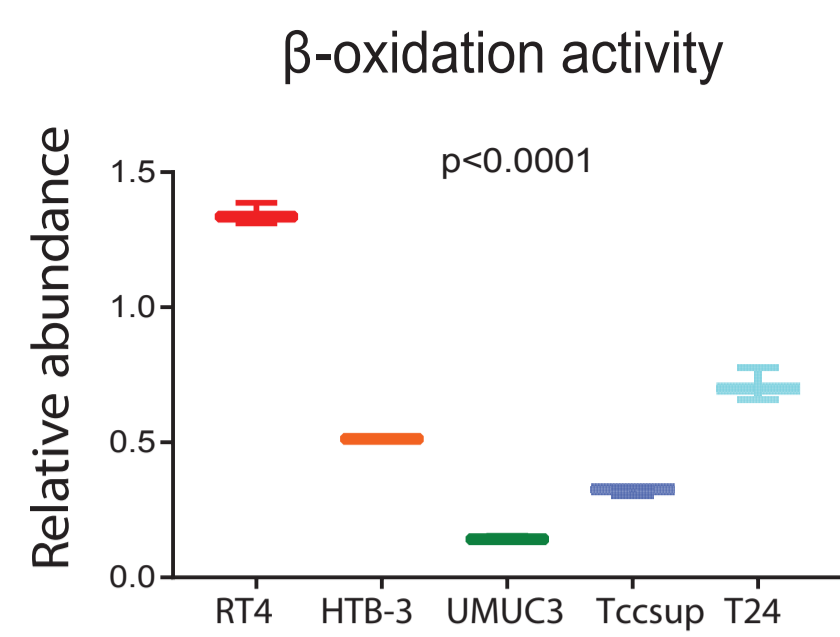

B)

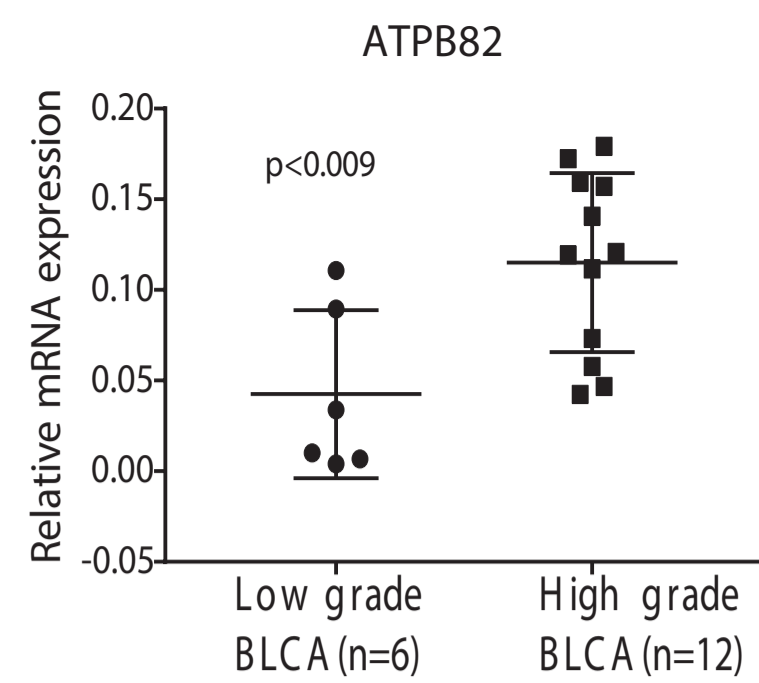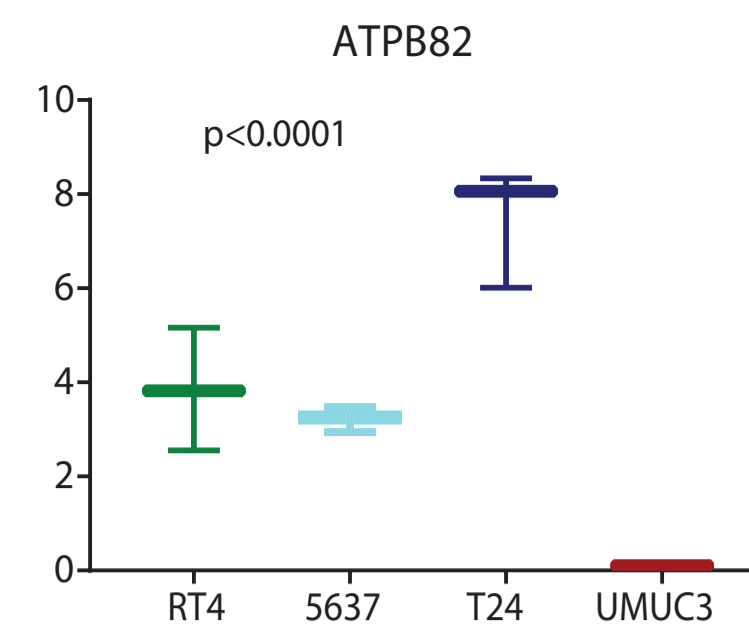

C)

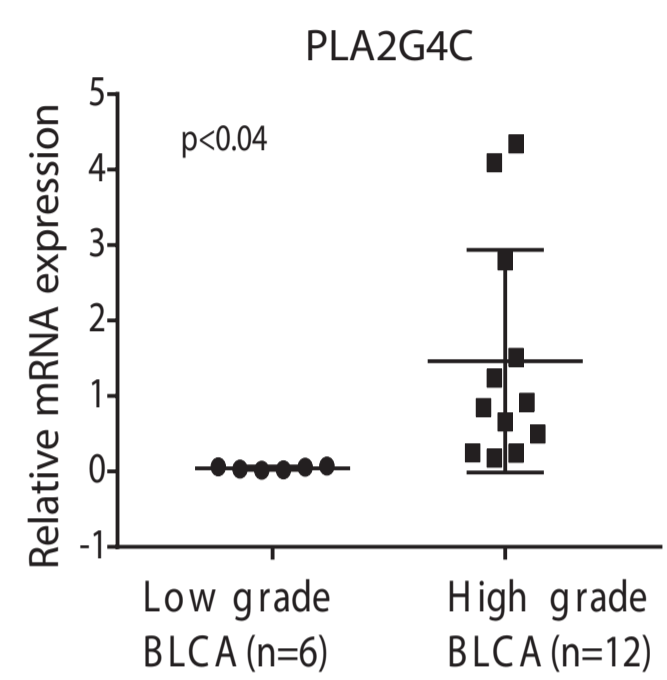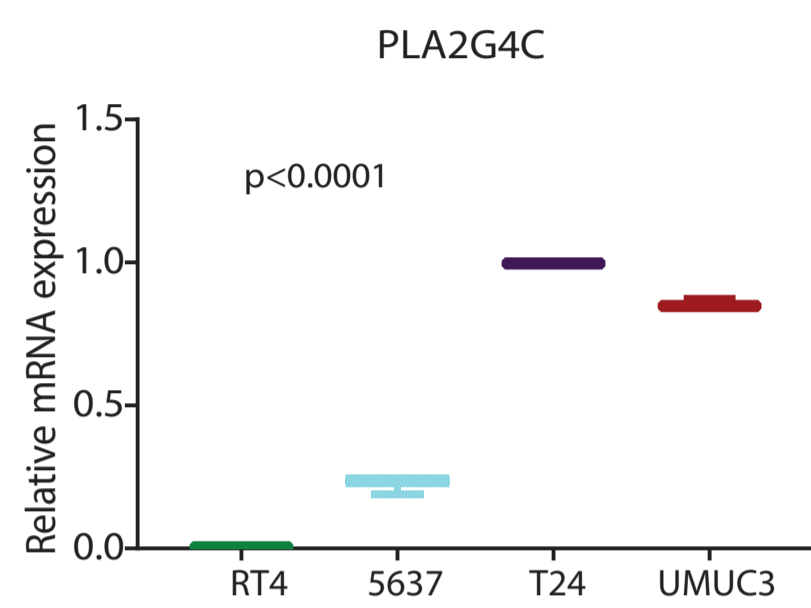

**Supplementary Figure S8**

Supplement: NIHMS1523810-supplement-8.pdf [file NIHMS1523810-supplement-8.pdf]
